1 **EHD1-dependent traffic of IGF-1 receptor to the cell surface is essential for**  
2 **Ewing sarcoma tumorigenesis and metastasis**

3 Sukanya Chakraborty<sup>1, 2</sup>, Aaqib M. Bhat<sup>1, 2</sup>, Insha Mushtaq<sup>1, §</sup>, Haitao Luan<sup>1</sup>, Achyuth Kalluchi<sup>2</sup>, Sameer  
4 Mirza<sup>2, §</sup>, Matthew D. Storck<sup>1</sup>, Nagendra Chaturvedi<sup>3</sup>, Jose Antonio Lopez- Guerrero<sup>4</sup>, Antonio Llombart-  
5 Bosch<sup>5</sup>, Isidro Machado<sup>5</sup>, Katia Scotlandi<sup>6</sup>, Jane L. Meza<sup>7, 8</sup>, Gargi Ghosal<sup>2, 8</sup>, Donald W. Coulter<sup>3, 8</sup>, M  
6 Jordan Rowley<sup>2, 8</sup>, Vimla Band<sup>2, 8</sup>, Bhopal C. Mohapatra<sup>2, 8, #</sup>, Hamid Band<sup>1, 2, 7, 8, #</sup>

7  
8 <sup>1</sup>Eppley Institute for Research in Cancer and Allied Diseases, University of Nebraska Medical Center, NE  
9 68198, USA; <sup>2</sup>Department of Genetics, Cell Biology & Anatomy, College of Medicine, University of  
10 Nebraska Medical Center, NE 68198, USA; <sup>3</sup>Department of Pediatrics, University of Nebraska Medical  
11 Center, NE 68198, USA; <sup>4</sup>Laboratory of Molecular Biology, Fundació Instituto Valenciano de  
12 Oncología, Valencia, Spain; <sup>5</sup>Department of Pathology, University of Valencia, Avd. Blasco Ibáñez 15,  
13 46010 Valencia, Spain; <sup>6</sup>Experimental Oncology Laboratory, IRCCS Istituto Ortopedici Rizzoli, 40136  
14 Bologna Italy; <sup>7</sup>Department of Biostatistics, College of Public Health, University of Nebraska Medical  
15 Center, NE 68198; <sup>8</sup>Fred & Pamela Buffett Cancer Center, University of Nebraska Medical Center, NE  
16 68198, USA.

17 **§Current Address:** SM, Department of Chemistry, College of Science, United Arab Emirates University,  
18 Al Ain, UAE; IM, Incyte Corporation Wilmington, DE

19 **Running Title:** EHD1-IGF-1R axis in Ewing sarcoma tumorigenesis

20 **#Corresponding authors:** Hamid Band, MD, PhD, Eppley Institute for Research in Cancer and Allied  
21 Disease, 986805 Nebraska Medical Center, Omaha, NE 68198-6805, USA; Email: [hband@unmc.edu](mailto:hband@unmc.edu);  
22 Phone: 402-559-8572, Bhopal C. Mohapatra, PhD, Department of Genetics Cell Biology & Anatomy,  
23 University of Nebraska Medical Center, 985805 Nebraska Medical Center, Omaha, NE, 68198, USA.  
24 [bmohapat@unmc.edu](mailto:bmohapat@unmc.edu); Phone: 402-559-8542

25

26 **ABSTRACT**

27 Overexpression of EPS15 Homology Domain containing 1 (EHD1) has been linked to tumorigenesis but  
28 whether its core function as a regulator of intracellular traffic of cell surface receptors plays a role in  
29 oncogenesis remains unknown. We establish that EHD1 is overexpressed in Ewing sarcoma (EWS), with  
30 high EHD mRNA expression specifying shorter patient survival. ShRNA and CRISPR-knockout with  
31 mouse *Ehd1* rescue established a requirement of EHD1 for tumorigenesis and metastasis. RTK antibody  
32 arrays identified the IGF-1R as a target of EHD1 regulation in EWS. Mechanistically, we demonstrate a  
33 requirement of EHD1 for endocytic recycling and Golgi to plasma membrane traffic of IGF-1R to  
34 maintain its surface expression and downstream signaling. Conversely, EHD1 overexpression-dependent  
35 exaggerated oncogenic traits require IGF-1R expression and kinase activity. Our findings define the RTK  
36 traffic regulation as a proximal mechanism of EHD1 overexpression-dependent oncogenesis that  
37 impinges on IGF-1R in EWS, supporting the potential of IGF-1R and EHD1 co-targeting.

38 **Keywords:** receptor tyrosine kinases; intracellular traffic; tumorigenesis; metastasis; IGF-1 receptor

## 39 1. INTRODUCTION

40 Members of the EPS15 homology domain-containing (EHD) protein family (EHD1-4) of  
41 membrane-activated ATPases have emerged as key regulators of vesicular traffic along the endocytic  
42 pathway<sup>1, 2, 3</sup>. Among them, EHD1 has been investigated the most and is well-established to regulate the  
43 post-endocytic recycling back to the cell surface of a variety of cell surface receptors<sup>1, 2, 3</sup>. In contrast to  
44 this role in post-endocytic receptor traffic, our recent studies identified a unique role for EHD1 in the pre-  
45 activation transport of newly-synthesized RTKs, CSF1 receptor<sup>4</sup> and EGFR<sup>5</sup> from the Golgi to the plasma  
46 membrane to enable their efficient ligand-induced signaling and biological responses. These cell  
47 biological findings raise the possibility that overexpression of EHD1 in tumors could promote RTK-  
48 dependent oncogenic signaling by enabling the cell surface display of RTKs on tumor cells. This idea is  
49 consistent with recent findings in which EHD1 overexpression has been observed in various cancers,  
50 often correlating with shorter survival, and cell-based studies using gene knockdown or overexpression  
51 strategies that support the role of EHD1 overexpression to promote tumorigenesis, chemotherapy  
52 resistance, epithelial-mesenchymal transition, stem cell behavior and glycolysis in various tumor models  
53<sup>6, 7, 8, 9, 10, 11, 12, 13, 14, 15</sup>. These studies have linked EHD1 overexpression to distal signaling alterations such  
54 as the activation of NF $\kappa$ B,  $\beta$ -catenin/c-Myc pathways that are not immediately linked to EHD1's core  
55 vesicular traffic roles in endocytic recycling and Golgi to cell surface RTK traffic. Consistent with the  
56 potential of EHD1 expression in fact regulating RTK traffic in tumors, EHD1 levels in non-small cell  
57 lung cancer correlated with EGFR expression and specified shorter survival, metastasis, and  
58 chemotherapy resistance<sup>8, 16</sup>. EHD1 was also shown to promote erlotinib resistance in EGFR-mutant lung  
59 cancers<sup>11</sup>. However, direct evidence for regulation of RTK traffic as a proximal mechanism to activate  
60 the various distal signaling axes in EHD1-overexpressing cancers is currently lacking. Such a linkage is  
61 of considerable interest since receptor tyrosine kinases (RTKs) are well established as oncogenic drivers  
62 or as key secondary components of oncogenic programs of other driver oncogenes across cancers<sup>17</sup>.

63           The oncogenesis-associated overactivity of RTKs has been ascribed to multiple mechanisms,  
64 including gene amplification, increased transcription, genetic aberrations such as chromosomal  
65 translocation, point mutations or internal deletions, alterations of downstream signaling components, as  
66 well as activation through autocrine feedback loops<sup>18</sup>. A key mechanism of post-translational control of  
67 RTK levels and signaling involves the regulation of their intracellular traffic. One aspect of RTK traffic  
68 that has received the most attention is their post-activation endocytic traffic into either lysosomal  
69 degradation or the alternative recycling pathway back to the plasma membrane, with the balance of these  
70 mechanisms a key determinant of the magnitude, duration, and type of cellular responses elicited by  
71 ligand-induced RTK activation<sup>19</sup>. Indeed, altered endocytic trafficking of RTKs, including the imbalance  
72 between recycling versus degradation, is now known to promote oncogenic signaling by RTKs<sup>20,21</sup>.

73           To investigate the potential link of EHD1 to RTK-dependent tumorigenesis, we carried out  
74 studies using Ewing Sarcoma (EWS), the second most common malignant bone tumor in children and  
75 young adults<sup>22</sup>, as a model. Despite advances in multimodality treatment strategies, the EWS prognosis  
76 remains poor, with cure rates below 25%, due to its aggressive and metastatic nature<sup>23, 24, 25</sup>. More than  
77 85% of cases harbor reciprocal translocations that generate a currently undruggable fusion oncogene  
78 composed of portions of *EWS* and ETS transcription factor *FLI1*<sup>24</sup>. *EWS-FLI1* drives oncogenesis  
79 through altered transcriptional activity as well as other mechanisms that together promote a fully  
80 malignant phenotype<sup>26, 27</sup>.

81           Upregulation of signaling through multiple RTKs is implicated in EWS tumorigenesis,  
82 metastasis, and therapy resistance, with most attention to the role of insulin-like growth factor 1 receptor  
83 (IGF-1R)<sup>17</sup>. IGF-1R was demonstrated to be required for EWS/FLI1-mediated transformation of EWS  
84 cells<sup>28</sup>. Furthermore, EWS/FLI1 and other EWS-associated fusion oncoproteins transcriptionally  
85 upregulate the IGF-1 expression<sup>29</sup> EWS-FLI1 binding to IGF binding protein 3 (IGFBP-3) promoter was  
86 found to repress the expression of this key negative regulator of IGF-1R signaling, leading to  
87 constitutively active IGF-1R signaling in EWS cells<sup>30</sup>. IGF-1R and components of the IGF-1 receptor

88 signaling pathway have also been associated with the development, progression, and metastasis of breast,  
89 non-small cell lung, and other solid cancers<sup>31, 32, 33</sup>. Many preclinical studies support the potential of IGF-  
90 1R targeting to limit tumorigenesis and metastasis<sup>32, 34, 35</sup>. In EWS in particular, IGF-1R inhibition has  
91 been explored<sup>36, 37, 38, 39, 40, 41, 42, 43</sup> but the results of clinical trials with antibody- and tyrosine kinase  
92 inhibitor (TKI)-based IGF-1R targeting have been disappointing<sup>44, 45</sup>. The inefficacy of IGF-1R targeting  
93 in clinic likely reflects the lack of predictive markers of therapeutic response as well as our still  
94 incomplete understanding of the regulation of IGF-1R in tumors.

95         Given the important roles of IGF-1R and other RTKs in supporting the fusion oncoprotein-driven  
96 tumorigenesis and metastasis in EWS, we test our hypothesis that EHD1 overexpression enables high cell  
97 surface levels of RTK as a novel pro-oncogenic mechanism using EWS as a model. Our results establish a  
98 critical positive role of EHD1 overexpression in EWS oncogenesis and demonstrate that EHD1-dependent  
99 endocytic recycling and pre-activation Golgi to the plasma membrane traffic of IGF-1R are essential for  
100 its oncogenic role.

## 101         **2. MATERIALS AND METHODS**

102 **Ewing sarcoma patient tissue microarrays and immunohistochemical analysis:** A total of 324  
103 paraffin-embedded samples from ESFT patients from the period comprised between April 1971 and May  
104 2007 treated at Istituto Ortopedici Rizzoli (IOR), Bologna, Italy, and at the Department of Pathology of  
105 the University of Valencia Estudi General (UEVG), Spain were analyzed within the context of two  
106 European Translational Research projects [PROTHETS (<http://www.prothets.org>) and EuroBo-Net  
107 (<http://www.eurobonet.eu>)]. All cases were genetically confirmed as belonging to the ESFT by molecular  
108 biology and/or fluorescent in situ hybridization (FISH). Approval for data acquisition and analysis was  
109 obtained from the Ethics Committee of the institutions involved in the study. The clinical data were  
110 reviewed and stored within a specific database. Characteristics of the cohort and relevant clinical  
111 information have been previously reported<sup>67</sup>. A total of 24 tissue microarrays (TMAs) containing two  
112 representative cores for each case (1 mm in diameter) were constructed for immunohistochemical

113 analysis. Out of 324 samples, 307 and 227 samples could be analyzed for EHD1 and IGF-1R IHC  
114 expression, respectively. The deparaffinized sections were stained as per standard IHC protocol.  
115 Immunoreactivity was defined as follows: negative, fewer than 5% of tumor cells stained; poorly positive  
116 (score 1), between 5% and 10% of tumor cells stained; moderately positive (score 2), between 10% and  
117 50% of tumor cells stained, and strongly positive (score 3), with more than 50% of the tumor cells were  
118 stained.

119 **Cell lines and medium:** Human Ewing Sarcoma cell lines TC-71, MHH-ES-1 and A4573 were obtained  
120 from Dr. Jason Yustein laboratory at Baylor college of medicine(TC-71, MHH-ES-1:DSMZ-German  
121 collection, A4573: Cellonco) and cultured in complete RPMI medium (Hyclone; #SH30027.02) with 10%  
122 fetal bovine serum (Gibco; #10437-028), 10 mM HEPES (Hyclone; #SH30237.01), 1 mM each of sodium  
123 pyruvate (Corning; #25-000-CI), nonessential amino acids (Hyclone; #SH30238.01), and L-glutamine  
124 (Gibco; #25030-081), 50  $\mu$ M 2-ME (Gibco; #21985-023), and 1% penicillin/ streptomycin (#15140-122;  
125 Gibco). A673 and SK-ES-1 cells were obtained from ATCC and cultured in complete DMEM medium  
126 (Gibco; #11965-092), and complete RPMI medium supplemented as above. HEK-293T cells (ATCC  
127 CRL-3216) were cultured in complete DMEM medium. Cell lines were maintained for less than 30 days  
128 in continuous culture and were regularly tested for mycoplasma.

129 **Reagents and Antibodies:** Primary antibodies used for immunoblotting were as follows: anti-HSC70  
130 (#sc-7298) from Santa Cruz Biotechnology; anti-IGF-1R $\beta$  (#3018), anti-phospho-IGF-1R-Y1135  
131 (#3918), anti-phospho-AKT-S473 (#4060), anti-AKT (#4685), anti-ERK1/2 (#4695), anti-phospho-  
132 ERK1/2- Thr202/Tyr204 (#9101) from Cell Signaling Technology; and anti-beta-actin (#A5441) from  
133 Sigma. In-house generated Protein G-purified rabbit polyclonal anti-EHD1, EHD2, EHD3 and EHD4  
134 antibodies have been described previously<sup>2</sup>. The horseradish peroxidase (HRP)-conjugated Protein A  
135 (#101023) and HRP-conjugated rabbit anti-mouse secondary antibody (#31430) for immunoblotting were  
136 from Thermo Fisher. Antibodies used for immunofluorescence studies were as follows: anti-EHD1  
137 (#ab109311) from Abcam; Alexa-555-conjugated anti-GM130 (#48641), anti-LAMP1 (#9091) and anti-

138 RAB11 (#5589) from Cell Signaling Technology; and anti-IGF-1R $\beta$  (#MA5-13802) from Invitrogen.  
139 Secondary antibodies used for immunofluorescence studies were Alexa Fluor 594-conjugated goat anti-  
140 rabbit IgG (H + L) (#A11012) or Alexa Fluor 488-conjugated goat anti-mouse IgG (H + L) (#A11001)  
141 from Life Technologies Corporation. The Annexin-V-PI flow cytometric analysis was done using a kit  
142 (#V13241) from Invitrogen. Primary antibodies used for immunohistochemical studies included: anti-  
143 IGF-1R (#14534) and anti-cleaved-caspase 3 (#9661) from Cell Signaling Technology; and anti-CD99  
144 (#ab-227738) and anti-Ki67 (#ab92353) from Abcam. For immunoprecipitation studies, primary  
145 antibodies included: anti-IGF-1R $\beta$  (Cell Signaling technology; #9750), anti-EHD1 (Abcam; #ab109311)  
146 and anti-Rabbit-IgG (Invitrogen; #02-6102). The sources for other reagents were as follows:  
147 cycloheximide (Sigma; #C7698); bafilomycin-A1 (SelleckChem; #S1413); linsitinib (SelleckChem;  
148 #S1091); recombinant-human-IGF-1 (Peprotech; #100-11); IGF-1 Receptor  $\alpha$  mAb(1H7) (Santa Cruz;  
149 #sc-461); doxycycline (Sigma Aldrich; #D9891); Aprotinin (Sigma Aldrich #A1153); and Leupeptin  
150 (Sigma Aldrich #L2884).

151 **Generation of knockdown, CRISPR knockout and luciferase reporter cell lines:** To generate stable  
152 doxycycline-inducible EHD1-shRNA and non-targeting control (NTC)-shRNA expressing TC71, A673  
153 and SK-ES-1 cell lines, the following lentiviral SMART-vector constructs encoding a GFP and human  
154 EHD1-shRNA (#V3SH11252-229594140, #V3SH11252-225446205 and #V3SH11252-228109140,  
155 designated shEHD1 #1, #2 and #3, respectively) or an NTC-shRNA were obtained from Dharmacon.  
156 Lentiviral supernatants were by transient co-transfection of individual constructs with packaging plasmids  
157 (psPAX2, Addgene #12260 and pMD2.G, Addgene #12259 into HEK-293T cells using X-tremeGENE  
158 HP DNA transfection reagent (#06366236001; Roche). Lentiviral supernatants were applied to cells for  
159 48h in the presence of polybrene (10  $\mu$ g/ml, Sigma #H9268) and stable polyclonal cell lines were selected  
160 with 1  $\mu$ g/ml puromycin and maintained in their respective media with tetracycline-free 10% FBS (Novus  
161 Biologicals #S10350) and 1  $\mu$ g/ml puromycin. For CRISPR-Cas9 mediated gene editing, the EHD1  
162 sgRNA CRISPR/Cas9 All-in-One Lentivector (pLenti-U6-sgRNA-SFFV-Cas9-2A-Puro; #K0663105) or

163 Scrambled sgRNA CRISPR/Cas9 All-in-One Lentivector (#K010) from Applied Biological Materials  
164 were used to generate lentiviral supernatants that were transduced into TC71 or A673 cell lines followed  
165 by selection with 1 µg/ml puromycin. Clonal derivatives were obtained by limiting dilution and screened  
166 for complete knockout using western blotting. Unless otherwise indicated, 3 or 4 clones (maintained  
167 separately) representing two EHD1 sgRNA targets were pooled for experimental analyses. For rescue  
168 experiments, the mouse *Ehd1* lentiviral vector (pLenti-GIII-CMV-RFP-2A-Puro) (#190510640495;  
169 Applied Biological Materials) was stably transduced into TC71-EHD1-KO, A673-EHD1-KO and SK-ES-  
170 1 cell lines followed by selection with 1 µg/ml puromycin. The tdTomato-luciferase plasmid was  
171 generated by recombineering using the following pMuLE system plasmids from Addgene: pMuLE ENTR  
172 U6-miR-30 L1-R5 (#62113); pMuLE ENTR SV40 tdTomato L5-L2 (#62157) and pMuLE Lenti Dest  
173 Luc2 (#62179). The mCherry-luciferase plasmid (pCDH-EF-eFFly-T2A-mCherry; Addgene #104833)  
174 was used to generate lentiviral supernatants that were transduced into the indicated cell lines followed by  
175 FACS sorting of mCherry-high fraction. *EHD1* knockout sites were assessed by Sanger sequencing of  
176 PCR fragments generated with genomic DNA as template with the following primers: 5'-  
177 AGTGTGGGTCGCTCCCG-3' (forward) and 3'-GAGGAGCACCATAGGCTTGT-5' (reverse). For  
178 IGF-1R siRNA knockdown, ON-TARGETplus SMARTpool siRNA (#L-003012-00-0005), ON-  
179 TARGETplus Non-targeting pool(#D-001810-10-05) were transiently transfected into cells using  
180 Dharmafect I transfection reagent (#T-2001-01) (all from Dharmacon – Horizon Discovery).

181 **Western Blotting:** Whole cell extracts were prepared, and western blot was performed as described  
182 previously<sup>5</sup> with minor modifications. Cells were lysed in Triton-X-100 lysis buffer (50 mM Tris pH 7.5,  
183 150 mM NaCl, 0.5% Triton-X-100, 1 mM PMSF, 10 mM NaF, 1 mM sodium orthovanadate, 10 µg/ml  
184 each of Aprotinin and Leupeptin) Lysates were rocked at 4°C for >1 h, spun at 13,000 rpm for 30 minutes  
185 at 4°C and supernatant protein concentration determined using the BCA assay kit (#23225; Thermo  
186 Fisher Scientific). 30-50 µg aliquots of lysate proteins were resolved on sodium dodecyl sulfate-7.5%



187 polyacrylamide gel electrophoresis (SDS-PAGE), transferred to polyvinylidene fluoride (PVDF)  
188 membrane, and immunoblotted with the indicated antibodies.

189 **Immunoprecipitation (IP):** 1-mg aliquots of cleared lysate protein were incubated with optimized  
190 amounts of the indicated antibodies and rocked overnight at 4°C. 60 µl of PBS-pre-washed and PBS/1%  
191 BSA blocked protein A-Sepharose beads (#101042; Invitrogen) were added to each sample and rocked  
192 overnight at 4°C. The beads were washed six times with TX-100 lysis buffer, and bound proteins were  
193 resolved by SDS–7.5% PAGE, transferred to PVDF membrane, and immunoblotted with indicated  
194 primary antibodies. 50 µg aliquots of whole cell lysates were run as input controls.

195 **Immunofluorescence:** Cells plated on Poly-L-lysine coated coverslips were treated as indicated in figure  
196 legends, fixed using 4% paraformaldehyde in PBS for 20 minutes at RT. Cells were then permeabilized in  
197 0.3% Triton X-100 for 20 minutes at room temperature, blocked with 10% goat serum in PBS, and  
198 incubated with primary antibodies in 1% goat serum and 1% BSA in PBS at 4°C overnight. After washes  
199 in 0.1% BSA-PBS, cells were incubated with the appropriate fluorochrome-conjugated secondary  
200 antibody for 1 hour at RT, washed 0.1% BSA-PBS and mounted using Vectashield-mounting medium  
201 with DAPI (Vector Laboratories; #H-1500). Confocal images were captured using a Zeiss LSM 800 with  
202 microscope Airyscan. Merged pictures were generated using ZEN 2012 software from Carl Zeiss and  
203 fluorescence intensities were quantified using the ImageJ (NIH) software. Pearson's correlation  
204 coefficients of Co-localization were analyzed using the ImageJ JACoP colocalization analysis module. A  
205 threshold was established first using the JACoP threshold optimizer, followed by calculation of Pearson's  
206 correlation coefficients.

207 **Quantification of cell surface IGF-1R using FACS analysis:**  $2 \times 10^5$  cells were seeded per well of six-  
208 well plates and grown in regular medium with 10% FBS for 48 h. Cells were further treated as indicated  
209 in figure legends, rinsed with ice-cold PBS, released from dishes with trypsin-EDTA (#15400054;  
210 LifeTech (ThermoFisher)) and the trypsinization stopped by adding equal volume of soybean trypsin  
211 inhibitor (#17075029; LifeTech (ThermoFisher)) Cells were washed thrice in ice-cold FACS buffer (1%

212 BSA in PBS), and live cells stained with PE-anti-human-IGF-1R (#351806; Biolegend) or PE-Mouse-IgG  
213 isotype control (#400112; Biolegend). FACS analyses were performed on a LSRFortessa X50 instrument  
214 and data analyzed using the FlowJo software.

215 **Trans-well migration and invasion assay:** For migration and invasion assays,  $2 \times 10^5$  cells were seeded  
216 in top chambers of regular or Matrigel-coated trans-wells (migration – Corning #353097; invasion –  
217 Corning #354480) in 400  $\mu$ l of 0.5% FBS-containing medium for 3 hours before migration/invasion  
218 towards medium containing 10% FBS or 100 ng/ml IGF-1 in lower chambers, as indicated in figure  
219 legends. Both the top and lower chamber media contained Mitomycin C (10  $\mu$ g/ml) to eliminate the  
220 contribution of cell proliferation. After 16 hours, the cells on the upper surface of the membranes were  
221 scraped with cotton swabs, and the migrated cells on the bottom surface were fixed and stained in 0.5%  
222 crystal violet in methanol. Five randomly selected visual fields on each insert were photographed, and  
223 cells were enumerated using the ImageJ software. Each experiment was run in triplicates and repeated  
224 three times.

225 **Cell proliferation assay:** 500 cells/well were seeded in 96-well flat-bottom plates in 100  $\mu$ l medium and  
226 an equal volume of the CellTiter-Glo Luminescent Assay Reagent (#G7571; Promega) added at the  
227 indicated time-points. Luminescence was recorded using a GloMax® luminometer (Promega).

228 **Anchorage independent growth assay:**  $10^4$  cells suspended in 0.4% soft agar were plated on top of a  
229 pre-solidified 0.8% soft agar bottom layer in 6-well plates. After two weeks, cells were fixed and stained  
230 with 0.5% crystal violet in methanol and imaged under a phase contrast microscope. The number of  
231 colonies in the entire well were quantified using the Image J software. All experiments were done in  
232 triplicates and repeated three times.

233 **Tumor-sphere assay:** Cells were suspended in DMEM/F12 media (Thermo Fisher; #1133032)  
234 supplemented with 1% penicillin/streptomycin, 4  $\mu$ g/ml heparin (Stem cell technologies; #07980), 20  
235 ng/ml Animal-Free Recombinant Human EGF (Peprotech; #AF-100-15), 10 ng/ml Recombinant Human

236 FGF-basic (Peprotech; #100-18B), 1X N-2 supplement (Gibco; #17502-048), 1X B27 supplement  
237 (Gibco; #17504-044) and 4% Matrigel (BD Biosciences; #356234) and seeded at  $10^4$ /well in ultra-low  
238 attachment 24-well plates in ... volume. After one week, tumor-spheres were imaged under a phase  
239 contrast microscope. Tumor-spheres greater than 40  $\mu\text{m}$  in diameter were quantified using the Image J  
240 software. All experiments were done in triplicates and repeated 3 times.

241 **RNA sequencing and enrichment analysis of differentially expressed genes:** Total RNA was isolated  
242 using Qiagen RNeasy RNA extraction kit (#74104) and further cleaned using the RNeasy PowerClean  
243 Pro Cleanup kit (#13997-50), as per manufacturer's protocols. The purity of RNA was assessed on a  
244 Bioanalyzer in the UNMC Next Generation Sequencing Facility. 1  $\mu\text{g}$  of cleaned RNA samples were used  
245 to generate RNA-seq libraries using the TruSeq RNA Library Prep Kit v2 (Illumina) following the  
246 manufacturer's protocols and sequenced using the 2 x 75 bases paired-end protocol on a NextSeq550  
247 instrument (Illumina). For differential expression analysis, paired-end reads were aligned to the human  
248 genome version hg38 using hisat2 guided by Ensembl gene annotations<sup>68</sup> and annotated transcripts were  
249 quantified and TPM normalized using Stringtie 2.1.1<sup>69</sup> Differential expression was assessed by DESeq2<sup>70</sup>  
250 and significantly changed genes were required to have a Benjamini–Hochberg adjusted p-value of  $< 0.05$   
251 and a 2-fold change in expression. Gene Set Enrichment Analysis (GSEA) and pathway analyses were  
252 performed using MSigDB and Ingenuity-Pathway Analysis (IPA).

253 **RNA isolation and Real Time-PCR analysis:** Total RNA was extracted from cells using the Qiagen  
254 RNeasy RNA extraction kit (#74104) as per manufacturer's protocols. cDNA was obtained by reverse  
255 transcription using the QuantiTect Reverse Transcription kit (Qiagen; #205311) and real-time qPCR was  
256 performed using the SYBR Green labeling method (Qiagen; QuantiTect SYBR Green PCR kit #204143)  
257 on an Applied Bioscience QuantStudio thermocycler. The primer sequences (Integrated DNA  
258 Technologies) for qRT-PCR were: human *IGF1R* 5'-TCTGGCTTGATTGGTCTGGC-3'(forward),5'-  
259 AACCATGGCTGTGCAGTCA-3'(reverse); *PCNA* 5'-AGCAGAGTGGTCGTTGTCTTT-3' (forward),  
260 5'-TAGGTGTCGAAGCCCTCAGA-3' (reverse); *E2F1* 5'-CGCCATCCAGGAAAAGGTGT-

261 3'(forward), 5'-AAGCGCTTGGTGGTCAGATT-3' (reverse); *E2F2* 5'-  
262 CAACATCCAGTGGGTAGGCA-3'(forward), 5'-TGCTCCGTGTTTCATCAGCTC-3' (reverse); *CDK4*  
263 5'-TGTATGGGGCCGTAGGAAC-3'(forward), 5'-TCCAGTCGCCTCAGTAAAGC-3'(reverse); *CDK6*  
264 5'-ACCCACAGAAACCATAAAGGATA-3'(forward), 5'-GCGGTTTCAGATCACGATGC-3'(reverse).

265 The fold change of gene expression was calculated relative to the control using the  $\Delta\Delta C_t$  method and  
266 normalized to *GAPDH*.

267 **Phospho-RTK array analysis:** The Human Phospho-RTK Array Kit from R&D systems (#ARY001B)  
268 was used. Cells grown to 80% confluency were lysed and 300  $\mu\text{g}$  of lysate protein were applied to  
269 supplied arrays and processed according to manufacturer's instructions. Signals corresponding to 49  
270 tyrosine phosphorylated RTKs on the array were visualized using chemiluminescence and analyzed using  
271 ImageJ software; average signal (pixel density) of duplicate spots was used to calculate fold differences.

272 **Xenograft studies and IVIS imaging:** All animal experiments were performed with the approval of the  
273 UNMC Institutional Animal Care and Use Committee (IACUC Protocol 19-017-04-FC). For analyses of  
274 EHD1-knockdown cell implants, 6-week-old female athymic nude mice (Charles River) were injected via  
275 the intratibial route with  $10^6$  cells (in 100  $\mu\text{l}$  cold PBS) engineered with lentiviral tdTomato-luciferase.  
276 Once palpable tumors were observed, the mice were randomly assigned into minus (-) Dox or plus (+)  
277 Dox groups (Dox at 2 mg/ml in drinking water with 1% sucrose). For analyses of EHD1-KO and  
278 mEHD1-rescued cell implants, 6-week-old male athymic nude mice were injected via the intratibial route  
279 with  $2 \times 10^5$  cells (in 20  $\mu\text{l}$  cold PBS) engineered with lentiviral mCherry-enhanced luciferase. Tumor  
280 growth was monitored biweekly for up to 30 days using calipers, with tumor volume calculated from  
281 length x width<sup>2</sup>/2. For bioluminescent imaging, mice received an intraperitoneal injection of 200  $\mu\text{l}$  D-  
282 luciferin (15 mg/ml; Millipore Sigma #L9504) 15 min before isoflurane anesthesia and were placed  
283 dorso-ventrally in the IVIS<sup>TM</sup> Imaging System (IVIS 2000). Images were acquired using the IVIS  
284 Spectrum CT and analyzed using the Living Image 4.4 software (PerkinElmer). Mice were imaged  
285 weekly and followed for up to 30 days. At the end of the study, mice were euthanized, and hind limbs,

286 lungs and livers harvested. Bioluminescent signals from the harvested lungs and livers were recorded for  
287 analyses of tumor metastasis. Resected tumor xenografts were fixed in formalin, and paraffin-embedded  
288 tissue sections were used to perform the immunohistochemical staining.

289 **Bone quality analysis by micro-CT:** The hind legs of mice harvested post-euthanasia were fixed in  
290 formalin and scanned using a micro-CT instrument (Skyscan 1172, Bruker). The parameters were 55 kV,  
291 181  $\mu$ A, 0.5 mm aluminum filter, 9  $\mu$ m resolution, 4 frames averaging, 0.4 rotation step, 180° scanning.  
292 The raw images were reconstructed using the NRecon software (version 1.7.4.6, Bruker microCT). All  
293 reconstructed images were registered and realigned before analysis using the DataViewer software  
294 (version 1.5.6.2, Bruker microCT). The tibial bone was then evaluated using CTAn software (version  
295 1.18.8.0, Bruker microCT) to calculate the percent bone volume (BV/TV), trabecular thickness (Tb.Th),  
296 trabecular number (Tb.N) and trabecular separation (Tb.Sp).

297 **Statistical analysis:** GraphPad Prism software (version 8.0.2) was employed to perform all the statistical  
298 analyses. Statistical analyses of *in vitro* data were performed by comparing two groups using two-tailed  
299 student's t test. Two-way ANOVA test was used to analyze the *in vivo* mouse tumor growth. P values  
300 equal to or <0.05 were considered significant. For patient tissue sample analyses, association with  
301 categorical histopathological parameters was assessed using a chi-square test to determine homogeneity  
302 or linear trend for ordinal variables. The significance level was set at 5%. To study the impact of the  
303 histological, immunohistochemical and molecular factors on progression-free survival (PFS) and disease-  
304 specific survival (DSS), the Kaplan-Meier proportional risk test (log rank) was used.

### 305 **3. RESULTS**

#### 306 **EHD1 is overexpressed in EWS patient tumors and correlates with shorter event-free and overall** 307 **survival**

308 To assess if EHD1 is overexpressed in EWS patient tumors and if its overexpression bears any  
309 relationship with patient survival, we queried the publicly-available EWS patient tumor mRNA

310 expression data using the R2 Genomics Analysis and Visualization Platform. Dichotomization of EHD1  
311 mRNA expression levels into EHD1-High and EHD1-Low groups (mRNA expression cutoff: 439.8 TPM  
312 for event-free and 490.8 TPM for overall survival) followed by Kaplan-Meier survival analysis revealed  
313 that high EHD1 mRNA overexpression correlated with shorter event-free and overall survival in EWS  
314 patients (**Fig. 1A-B**). To assess if EHD1 expression is detectable in EWS patient tumors at the protein  
315 level, we carried out an immunohistochemistry (IHC) analysis of EHD1 expression in a tissue microarray  
316 of 324 EWS patient tumors. 88.6% of the 307 evaluable samples showed high EHD1 expression (IHC  
317 staining intensity of 2 or 3), while 7.49% showed low EHD1 expression (staining intensity of 1) with  
318 3.91% deemed as negative (staining intensity of 0) (**Fig. 1C-D**). The level of EHD1 expression was  
319 significantly higher in metastases vs. the primary tumors (**Fig. 1E**). While limited survival data  
320 disallowed survival analyses, the IHC data further supported the idea that high EHD1 expression is a  
321 feature of a majority of EWS patient tumors. Overall, these analyses supported a potential pro-oncogenic  
322 role of EHD1 in EWS.

### 323 **EHD1 is required for the maintenance of *in vitro* pro-tumorigenic and pro-metastatic oncogenic** 324 **traits of EWS cell lines**

325 To identify EWS cell models suitable for delineating the role of EHD1 in tumor biology, we first  
326 queried the CCLE database and found that most of the 19 included EWS cell lines expressed moderate  
327 EHD1 mRNA levels relative to the total cell line panel (**Supplementary Table 1**). Analysis of a subset of  
328 EWS cell lines representing the three EWS-FLI1 fusion oncogene types (TC71 and A673 -Type I EWS-  
329 FLI1 fusion; MHH-ES1, SK-ES-1 - Type II EWS-FLI1 fusion; and A4573 - Type III fusion) by  
330 immunoblotting revealed a good correlation between mRNA and protein levels, with consistently lower  
331 EHD1 protein levels in SK-ES-1 compared to the other 4 EWS cell lines, which showed robust EHD1  
332 expression (A4573 is absent in the CCLE data) (**Supplementary Fig S1A**). While EHD2 was  
333 undetectable, all cell lines showed EHD3 expression with variable levels of EHD4. Based on these  
334 results, we used lentiviral constructs to engineer TC71, A673, and SK-ES-1 cell lines stably expressing 3

335 distinct doxycycline (Dox)-inducible EHD1-specific shRNAs (shEHD1) or a non-targeting control  
336 shRNA (shNTC). The shEHD1 #2 and #3 lines with robust EHD1 knockdown (KD), specifically upon  
337 Dox treatment (**Fig. 2A**), were selected for further analyses.

338 First, we examined the impact of Dox-induced EHD1 KD on the various *in vitro* oncogenic traits.  
339 EHD1-KD markedly and significantly reduced the magnitude of cell proliferation, measured using the  
340 Cell-Titer Glo assay in TC71, A673, and SK-ES-1 cell lines (**Fig. 2C, Supplementary Fig S1B**).  
341 Furthermore, EHD1-KD in A673 and TC71 cell lines induced a significant reduction in anchorage-  
342 independent growth on soft-agar and tumor-sphere forming ability (**Fig. 2E-F, Supplementary Fig. S1C-**  
343 **D**). EHD1-KD also induced a drastic reduction of trans-well cell migration and invasiveness (migration  
344 through Matrigel) (**Fig. 2G-H and Supplementary Fig. S1E-H**). Treatment with the cell-proliferation  
345 inhibitor mitomycin-C excluded the role of reduced cell proliferation as a major contributor to reduction  
346 in migration and invasion; the modest reduction in proliferation in 24 hours could not account for the  
347 nearly 85% reduction in migration and invasion ability.

348 To further establish the pro-oncogenic role of EHD1 and its specificity, we generated CRISPR-  
349 Cas9 *EHD1* knockout (KO) derivatives of TC71 and A673 cell lines and then used a lentiviral construct  
350 to stably express mouse *Ehd1* (mEHD1) in the EHD1-KO cell lines to assess the rescue of any functional  
351 deficits (**Fig. 2B, Supplementary Fig. S1K**). Indeed, EHD1-KO induced a pronounced decrease in the  
352 cell proliferation and migratory ability, and this deficit was rescued mEHD1 (**Fig. 2D,2I, Supplementary**  
353 **Fig. S1I**); consistent with higher levels of the introduced mEHD1, the rescued cell lines displayed  
354 increased proliferation and migration relative to parental lines. Further illustrating the pro-oncogenic role  
355 of EHD1 overexpression, introduction of mouse *Ehd1* into EHD1-low SK-ES-1 cell line led to a marked  
356 and significant increase in cell proliferation, migration and invasion compared to parental cells (**Fig 2J-**  
357 **M, Supplementary Fig. S1J**). RNA-seq analysis showed a marked reduction in cell cycle regulatory  
358 gene expression Dox-treated shNTC vs. shEHD1 EWS cell lines among the significantly downregulated  
359 pathways (**Supplementary Fig. S2A-F**) and qPCR analysis validated the downregulation of *CDK4*,

360 *CDK6*, *E2F1*, *E2F2*, and *PCNA* mRNA levels (**Supplementary Fig. S2D**). Collectively, our KD, KO,  
361 rescue, and overexpression analyses strongly support a key positive role of EHD1 in promoting pro-  
362 tumorigenic and pro-metastatic traits of EWS cells.

### 363 **EHD1 is required for *in vivo* EWS tumorigenesis**

364 To assess if the marked reduction in pro-oncogenic traits seen *in vitro* translates into impaired  
365 tumorigenesis *in vivo*, we implanted TC71 NTC, EHD1-KO, and mEHD1 rescue cell lines engineered  
366 with a lentiviral mCherry-enhanced luciferase reporter<sup>46</sup> in the tibiae of Nude mice (n=8 per group at the  
367 beginning) and monitored the tumor growth by luminescence imaging. While the NTC tumors exhibited  
368 time-dependent growth (seen as an increase in log<sub>10</sub> photon flux), the EHD1-KO tumors failed to grow  
369 and, in fact, showed a reduction in photon flux; in contrast, implants of mEHD1-rescued EHD1-KO cells  
370 exhibited rapid tumor growth with higher photon flux, and mice in this group reached the euthanasia  
371 endpoints a week earlier (**Fig. 3A-B, Supplementary Fig S3A-B**). IVIS imaging of lungs resected at  
372 necropsy revealed detectable metastatic seeding in 3 of 8 mice implanted with NTC cells but not in any of  
373 the mice implanted with EHD1-KO cells. In contrast, 7/8 mice implanted with mEHD1-rescued cells  
374 showed metastases (**Fig. 3C-D**). Notably, 1/8 NTC and 2/8 rescued cell line-implanted mice exhibited  
375 liver metastases. Morphometric analysis of tibial bone by micro-CT scanning showed reduced bone  
376 volume, trabecular number, thickness, and separation in mice implanted with NTC or mEHD1-rescued  
377 TC71 cells, indicative of increased tumor-induced bone degradation, with a significant amelioration of  
378 these defects in tibiae of mice implanted with EHD1-KO cells (**Fig. 3E-F**).

379 To assess the impact of inducible EHD1 KD on pre-formed tumors, we implanted Nude mice  
380 with shNTC or shEHD1 (#3) TC71 cell lines carrying the TdTomato-luciferase reporter and monitored  
381 the tumor growth by IVIS imaging, as above. Groups of tumor-implanted mice (n=7/group for NTC and  
382 6/group for shEHD1) were either followed as such or switched to Dox-containing water from Day 10.  
383 Comparable time-dependent growth of shNTC TC71 implants without or with Dox treatment excluded  
384 any impact of Dox itself; in contrast, the growth of shEHD1 TC71 tumors was markedly reduced by Dox



385 treatment compared to untreated mice ( $p < 0.0001$ ; **Supplementary FigS4A-B**). Western blotting of  
386 resected tumor lysates confirmed the Dox-induced EHD1 KD in the shEHD1 group, and IHC staining  
387 with anti-human CD99 confirmed the tumor mass (**Supplementary Fig.S4C-D**). Tumors of Dox-treated  
388 shEHD1-implanted mice showed fewer proliferating tumor cells (Ki-67 staining) and an increase in  
389 apoptotic cells (cleaved-caspase3) (**Supplementary FigS2E**). Collectively, these results unequivocally  
390 demonstrate a requirement of EHD1 for EWS tumorigenesis and metastasis.

### 391 **Identification of IGF-1R as an EHD1 target in EWS**

392         Given our prior identification of EHD1 as a regulator of Golgi to plasma membrane traffic and  
393 subsequent signaling of EGFR and CSF-1R<sup>4,5</sup>, we hypothesized that regulation of RTKs may underlie  
394 the requirement of EHD1 in EWS oncogenesis. We, therefore, probed a phospho-RTK profiling array  
395 incorporating 49 of 58 human RTKs with lysates of untreated (control) vs. Dox-treated (KD) shEHD1 #3  
396 TC71 or A673 cell lines. The levels of phospho-IGF-1R were specifically reduced upon Dox treatment of  
397 both cell lines, while changes in other phospho-RTKs were not seen in both (**Fig. 4A**). Consistent with  
398 our findings with EGFR and CSF1R<sup>5</sup>, analysis of TC71 cell lines harboring two distinct shRNAs (#2 or  
399 #3) demonstrated a reduction in total IGF-1R levels upon EHD1-KD (**Fig. 4B**). These results were further  
400 validated using control vs. CRISPR-KO TC71 and A673 cell lines; notably, mEHD1-rescued KO cell  
401 lines exhibited higher total IGF-1R levels than the non-targeted controls, consistent with higher mEHD1  
402 levels compared to that of endogenous EHD1 in control cells (**Fig. 4C**). qPCR analyses demonstrated  
403 comparable IGF-1R mRNA levels between the NTC and EHD1-KO cell lines, excluding EHD1  
404 regulation of IGF-1R levels at the mRNA level (**Supplementary Fig. S5A**).

405         The cell surface levels of RTKs determine their access to ligands and hence the downstream  
406 responses<sup>20</sup>. To assess if EHD1 is required for cell surface IGF-1R expression, we carried out live-cell  
407 IGF-1R immunostaining followed by FACS analysis on control vs. EHD1-KO TC71 and A673 cell lines  
408 under three distinct conditions: 1. Cells cultured in regular medium with 10% FBS (steady state). 2. Cells  
409 in regular medium treated with IGF-1 (100 ng/ml) to promote ligand-induced internalization and

410 degradation of IGF-1R. 3. Cells in regular medium treated with IGF-1 (100 ng/ml) for 16 hours to  
411 promote the downregulation of cell surface IGF-1R followed by culture in low serum (0.5%) medium  
412 without added IGF-1 for 24 hours to allow the newly-synthesized receptor to accumulate at the cell  
413 surface. The cell surface IGF-1R on control cells decreased upon IGF-1 treatment followed by an increase  
414 when cultured in low-serum/IGF-1-free medium, reflecting the transport of newly synthesized IGF-1R to  
415 the cell surface (**Fig. 4D**). The EHD1-KO cells, in contrast, exhibited lower cell surface levels under all  
416 conditions, and the extent of IGF-1-induced surface IGF-1R downregulation was smaller than in control  
417 cells (**Fig. 4D**). Concurrent immunoblotting confirmed the lower IGF-1R levels in KO cells under all  
418 conditions examined (Fig. 4E). Immunofluorescence microscopy further confirmed the lower cell surface  
419 IGF1R levels in EHD1-KO compared to control TC71 or A673 cell lines (**Supplementary Fig. S5B**).  
420 Notably, anti-IGF-1R IHC of the EWS patient TMAs (same as those used for EHD1 staining) showed  
421 that 60.35% of the 227 interpretable samples exhibited high (staining intensity of 2-3) IGF-1R staining  
422 (**Fig. 4F-G**), with a positive correlation (Spearman's Correlation Coefficient = 0.179) between EHD1 and  
423 IGF-1R staining (**Fig. 4H-I**).

#### 424 **EHD1 controls the cell surface levels of IGF-1R by regulating its intracellular traffic itinerary**

425 EHD1 is known to facilitate the recycling of many non-RTK receptors following their  
426 endocytosis via the Rab11+ endocytic recycling compartment <sup>47</sup> but whether EHD1 regulates RTK  
427 recycling, a key mechanism to counteract the alternate lysosomal delivery and degradation after ligand-  
428 induced internalization <sup>20</sup>, is unknown. Consistent with EHD1-dependent RTK recycling, we previously  
429 observed that EHD1 colocalizes with an oncogenic kinase-active mutant or wildtype EGFR in endocytic  
430 compartments <sup>5</sup>. Furthermore, ectopically overexpressed IGF-1R and EHD1 were shown to co-  
431 immunoprecipitate (co-IP), partially in an IGF-1 dependent manner, and to colocalize in intracellular  
432 vesicular compartments post-IGF-1 stimulation <sup>48</sup>.

433 To test the role of EHD1 in regulating the itinerary of pre-existing cell surface IGF-1R, we first  
434 carried out co-IP analyses of endogenous IGF-1R and EHD1 in lysates of TC71 and A673 cells that were

435 serum/IGF-1-deprived for 24h and then left unstimulated or stimulated with IGF-1 (50 ng/ml) for 1h.  
436 EHD1/IGF-1R complexes were seen both under unstimulated and IGF-stimulated conditions (**Fig. 5A**).  
437 Confocal imaging demonstrated that most IGF-1R was localized at the cell surface post-starvation, with a  
438 small intracellular pool colocalizing with EHD1; upon IGF-1 stimulation, a significantly larger  
439 intracellular, presumably endosome-localized, pool of IGF-1R colocalized with EHD1 (**Supplementary**  
440 **Fig. S6A-B**). To assess if the intracellular colocalization of EHD1-IGF-1R reflects a role of EHD1 in  
441 endocytic recycling of cell surface IGF-1R, serum/IGF-deprived (starved) control or EHD1-KO EWS cell  
442 lines were treated with cycloheximide (CHX) to inhibit further protein synthesis and pulsed with IGF-1 to  
443 promote IGF-1R endocytosis followed by chase in IGF-1-free medium for various times. Confocal  
444 imaging demonstrated that internalized IGF-1R became colocalized with the endocytic recycling  
445 compartment marker RAB11 in control cells (0 min chase) but subsequently (30- and 60-min chase)  
446 reappeared at the cell surface with a decrease in the RAB11-colocalizing intracellular signal, indicating  
447 efficient recycling; in contrast, EHD1-KO cells, showed continued IGF-1R/RAB11 colocalization during  
448 chase with lower cell surface levels. (**Fig. 5B, Supplementary Fig S7A**). These results support the role of  
449 EHD1-dependent endocytic recycling as one mechanism by which it sustains the cell surface levels of  
450 IGF-1R.

451 To assess if EHD1 also functions as a positive regulator of the Golgi to cell surface transport of  
452 newly synthesized IGF-1R, as we reported with CSF-1R and EGFR <sup>4, 5</sup>, we first treated TC71 or A673  
453 cell lines with IGF-1 to maximally deplete the cell surface and total IGF-1R (due to ligand-induced  
454 degradation). We then switched the cells to serum/IGF-1-deprivation medium and used confocal imaging  
455 to assess the appearance of newly synthesized IGF-1R in the Golgi compartment (co-staining with the  
456 Golgi marker GM130) and at the cell surface, with quantification of the latter. At time zero (after  
457 switching to serum/IGF-1-deprivation medium), both control and EHD1-KO cells exhibited weak overall  
458 and cell surface IGF-1R signals; the cell surface IGF-1R staining progressively increased in control cells  
459 with a minor intracellular pool colocalizing with GM130 (**Fig. 5C, Supplementary Fig. S7B**). In

460 contrast, only a minor increase in the cell surface pool of IGF-1R was observed over time in EHD1-KO  
461 cells; on the other hand, the KO cells exhibited strong intracellular IGF-1R persistently localizing in the  
462 GM130+ Golgi compartment (**Fig. 5C, Supplementary Fig. S7B**).

463 The marked decrease in the cell surface and total IGF-1R levels, without any change in IGF-1R  
464 mRNA levels in EHD1-depleted cells, suggested that IGF-1R is targeted for degradation. Based on our  
465 findings with CSF-1R in bone marrow-derived macrophages <sup>4</sup>, we assessed if this reflected the  
466 mistargeting of IGF-1R to lysosomes upon EHD1 depletion. Treatment of steady-state cultures of Control  
467 and EHD1-KO EWS cell lines with Bafilomycin-A1, a lysosomal proton pump blocker, led to a dramatic  
468 recovery of the low total IGF-1R levels in EHD1-KO cells, nearly approaching the levels in the untreated  
469 or Baf-A1-treated control EWS cells; Baf-A1 treatment had an insignificant effect on IGF-1R levels in  
470 control cells (**Fig. 6A-B**). Consistent with the WB findings, confocal imaging revealed that while the pool  
471 of IGF-1R localized to LAMP1+ lysosomes in control cells was relatively unchanged upon Baf-A1  
472 treatment, a marked and significant increase in this pool was evident in Baf-A1-treated vs. untreated  
473 EHD1-KO EWS cells (**Fig. 6C-F**). Collectively, these results suggest that EHD1 is required for efficient  
474 transport of IGF-1R from the Golgi and endosomal recycling compartment to the plasma membrane and  
475 that loss of EHD1 results in mistargeting of the cell-surface destined IGF-1R to the lysosome for  
476 degradation.

#### 477 **IGF-1R signaling is required for EHD1 to promote the oncogenic behavior of EWS cells**

478 Since optimal cell surface expression is essential for ligand-induced activation of RTKs <sup>18</sup>, and  
479 IGF-1R activation is critical for it to promote oncogenesis and metastasis <sup>49</sup>, we postulated that the  
480 positive role of EHD1 to promote the oncogenic behavior of EWS cells reflects the enhancement of IGF-  
481 1R signaling. Indeed, while control TC71 or A673 cells exhibited robust and relatively sustained IGF-1-  
482 induced phosphorylation of IGF-1R itself and of nodal readouts of its downstream signaling through AKT  
483 and MAPK signaling pathways (phospho-AKT-Ser473 and phospho-ERK1/2-Thr202/Tyr204), these  
484 responses were drastically and significantly impaired in EHD1-KO EWS cells (**Fig. 7A-D**). Gene-set

485 enrichment (GSE) analysis of the RNA-seq data showed significant enrichment for genes involved in  
486 PI3K-AKT-mTOR signaling, further supporting the premise that EHD1 regulates IGF-1R signaling to  
487 promote oncogenesis (**Fig. 7E**). Indeed, IGF-1-dependent cell proliferation and migration were drastically  
488 and significantly reduced in EHD1-KO TC71 and A673 cell lines compared to their controls (**Fig. 7F-G**).  
489 Furthermore, while the IGF-1R inhibitor Linsitinib significantly reduced the IGF-1-induced proliferation  
490 and migration of control EWS cell lines, the combination of EHD1-KO and Linsitinib produced an even  
491 greater reduction in these responses (**Fig. 7F-G**). Flow cytometric analysis of annexin-V/PI co-stained  
492 cells revealed a significantly higher proportion of apoptotic cells in EHD1-KO EWS cell lines; Linsitinib  
493 significantly increased the proportion of early and late apoptotic cells in control EWS cells and more so in  
494 EHD1-KO TC71 and A673 cells (**Fig. 7H, Supplementary Fig. S8A**). The additional Linsitinib  
495 inhibition of IGF-1-induced oncogenic traits in EHD1-KO cell lines is consistent with lower residual  
496 levels of IGF-1R in these cells.

497 To directly assess the requirement of IGF-1R for EHD1-dependent elevation of the oncogenic  
498 behavior of EWS cells, we targeted IGF-1R by multiple approaches in mEHD1-overexpressing SK-ES-1  
499 cell line, which exhibits a specific EHD1 overexpression-dependent enhancement of oncogenic traits (**Fig**  
500 **8A-B, Supplementary Fig S8E**). While control siRNA transfection had no impact on IGF-1-induced cell  
501 proliferation, migration, or invasion, siRNA KD of IGF-1R, pharmacological inhibition with Linsitinib,  
502 or treatment with an inhibitory monoclonal antibody 1H7<sup>50, 51</sup> impaired these *in vitro* readouts to a level  
503 comparable to those in parental EHD1-low cells (**Fig. 8C-I, Supplementary Fig S8B-G**). Comparable  
504 results were observed when apoptosis was measured as a readout (**Fig. 8D, Supplementary Fig S8B**).

#### 505 **4. DISCUSSION**

506 Besides driver oncogenes, tumor cells turn on multiple adaptive pathways for successful primary  
507 tumor growth and metastasis. Delineating these oncogenesis-enabling pathways is likely to identify novel  
508 biomarkers of malignant behavior and therapeutic responses of tumors and in some cases, offer  
509 opportunities for therapeutic targeting. Here, using Ewing Sarcoma (EWS) as a tumor model, we

510 demonstrate that the intracellular vesicular traffic regulatory protein EHD1 promotes tumorigenesis and  
511 metastasis by serving as a required element of IGF-1R traffic to enable IGF-1R-mediated oncogenic  
512 programs. While EWS is a relatively uncommon malignancy, it is the second most common bone and soft  
513 tissue tumor of children and young adults <sup>22</sup>. Importantly, the novel mechanistic insights we uncover  
514 using EWS models are likely to be broadly relevant to malignancies where RTKs serve as drivers or  
515 enablers of oncogenesis, and EHD1 protein is overexpressed.

516 In a large EWS tumor panel, we found moderate to high EHD1 overexpression in nearly 90% of  
517 patients, with significantly higher levels in metastatic tumors (**Fig.1D-E**). Query of publicly-available  
518 data revealed the high EHD1 mRNA expression to be associated with shorter patient survival (**Fig.1A-B**).  
519 Thus, clinical data support a positive role of EHD1 protein in EWS tumorigenesis. These findings are  
520 consistent with reports of EHD1 overexpression in other cancers, in many cases associated with shorter  
521 patient survival or resistance to therapy <sup>8, 11, 16</sup>.

522 Our comprehensive genetic analyses of EWS cell models definitively demonstrate that EHD1  
523 propels tumorigenic and metastatic behavior in EWS. Use of Doxycycline-inducible shRNA knockdown  
524 in cell line models demonstrated a strong dependence of cell proliferation, tumorsphere growth, cell  
525 migration, and invasion on EHD1 (**Fig.2C-H**), with a stronger impact in cells lines with higher EHD1  
526 expression (A673 and TC71) and a more modest impact in cells (SK-ES-1) with lower EHD1 levels  
527 (**Supplementary Fig.S1B, G**). Reciprocally, ectopic mouse *Ehd1* overexpression in the latter cells  
528 markedly enhanced their pro-tumorigenic and pro-metastatic traits (**Fig.2J-M**). EHD1-KO in A673 and  
529 TC71 cell models confirmed the requirement of EHD1 for the *in vitro* pro-tumorigenic and pro-metastatic  
530 behavior of EWS cells, and re-expression of mEHD1 restored the EHD1-KO defects (**Fig.2I**). Use of  
531 Dox-inducible KD or EHD2-KO EWS cell models in a bone implant model in nude mice demonstrated a  
532 key role of EHD1 in EWS tumorigenesis and metastasis *in vivo*, and the defective tumorigenic ability of  
533 EHD1-KO cells was completely restored by mEHD1 rescue (**Fig.3A-B**). Furthermore, the modest  
534 metastases forming ability of parental EWS cells was completely abolished by EHD1-KO; notably, the

535 mEHD1-rescued EHD1-KO cells, which express higher EHD1 levels than the parental cells, showed  
536 significantly more metastatic growths (**Fig.3C-D**). A hallmark of bone-associated tumors is the  
537 destruction of the surrounding bone<sup>52</sup>. Indeed, compared to significant bone destruction by parental cell  
538 implants, EHD1-KO cells failed to do so, and the process was accentuated in mEHD1-rescued KO cells  
539 (**Fig.3E-F**). Collectively, our clinical-pathological studies combined with our *in vitro* and *in vivo* genetic  
540 perturbation studies provide compelling evidence for a key role of EHD1 overexpression in sustaining  
541 EWS tumorigenesis and metastasis.

542 Our studies provide novel insights into how EHD1 serves in a pro-tumorigenic and pro-metastatic  
543 role. Our mechanistic studies were focused on two key considerations, one the established role of EHD1  
544 in regulating intracellular traffic of multiple cell surface receptors<sup>1, 53, 54</sup>, and our previous studies that  
545 have established a key role of EHD1 to ensure high cell surface expression of RTKs by regulating key  
546 aspects of their traffic<sup>4, 5</sup>. Our unbiased query of human receptor tyrosine kinome identified IGF-1R as a  
547 specific target (**Fig.4A**). Our comprehensive cell biological analyses demonstrate that EHD1 is required  
548 for Golgi to plasma membrane traffic of newly-synthesized IGF-1R to ensure high pre-activation levels of  
549 total and cell surface IGF-1R (**Fig.5C**), the latter a requirement for subsequent ligand-induced activation  
550 of signaling and cellular responses<sup>32</sup>. In addition, EHD1 plays a positive role in post-activation recycling  
551 of IGF-1R to help return it to the cell surface (**Fig.5B**), uncovering a second trafficking mechanism  
552 known to help sustain cell surface RTK levels by countering their lysosomal targeting<sup>20</sup>. Consistent with  
553 the key roles of EHD1 in regulating IGF-1R traffic to sustain its cell surface expression while negating its  
554 lysosomal degradation, our biochemical and subcellular localization analyses establish that lack of EHD1  
555 leads to marked mistargeting of IGF-1R to lysosomes where it is degraded (**Fig. 6**). Previous analyses  
556 have shown that EHD1 can interact with IGF-1R<sup>48</sup>, which we find is also the case in EWS cell models  
557 (**Fig. 5A**), but a role for EHD1 in regulating IGF-1R traffic has not been shown previously.

558 Notably, ligand-induced internalization, lysosomal degradation, and recycling of IGF-1R are  
559 well-established aspects of its traffic and signaling<sup>55, 56, 57, 58</sup>. Post-endocytic recycling of IGF-1R has been

560 shown to be positively regulated by myoferlin <sup>59</sup>, RAB11-FIP3 <sup>60</sup>, and GIGYF1 <sup>61</sup>. Thus, our studies  
561 identify EHD1 as a new regulator of IGF-1R endocytic recycling. RAB11-FIP3 is a component of  
562 endocytic recycling, in which EHD1 plays a key role <sup>1</sup>, and a family member RAB11-FIP2 interacts with  
563 EHD proteins <sup>47</sup>, suggesting the possibility that EHD1 may function together with RAB11-FIP proteins to  
564 regulate the recycling of IGF-1R and potentially other RTKs. Interestingly, ligand-dependent IGF-1R  
565 localization to Golgi has been associated with the migratory behavior of tumor cells, suggesting signaling  
566 capabilities of the Golgi-localized receptor <sup>62</sup>. In previous studies, we found EHD1 to play a role in  
567 retrograde traffic of cell surface EGFR to Golgi <sup>5</sup>, suggesting the possibility that EHD1 could play a  
568 similar role in IGF-1R traffic.

569 In contrast to its post-activation traffic, mechanisms that regulate the availability of IGF-1R at the  
570 cell surface prior to ligand binding have been less explored. Interestingly, Smoothed was found to  
571 positively regulate IGF-1R levels in lymphoma and breast cancer cell lines by stabilizing it in plasma  
572 membrane lipid rafts and preventing its lysosomal targeting <sup>63</sup>. Whether Smoothed regulates endocytic  
573 recycling or Golgi to cell surface IGF-1R traffic was not explored. Notably, we have shown EHD1  
574 regulation of Smoothed traffic in primary cilia <sup>64</sup>, raising the possibility that Smoothed and EHD1  
575 may co-regulate IGF-1R traffic.

576 Our findings linking EHD1 overexpression to regulation of an RTK well-established to control  
577 multiple aspects of oncogenesis provided a plausible basis for EHD1's pro-oncogenic role we uncovered.  
578 We provide multiple lines of evidence that this indeed is the case. Reduced cell surface IGF-1R  
579 expression upon EHD1-KO directly translated into reduced activation of downstream signaling (**Fig.7A-**  
580 **D**), and transcriptomic analyses support this conclusion (**Fig.7E**). Accordingly, EHD1-depleted EWS  
581 cells showed markedly reduced IGF-1-dependent proliferation, survival, and migration (**Fig.7F-H**).  
582 Furthermore, EHD1-KO status sensitized the EWS cells to elevated levels of apoptosis and a further  
583 reduction in cell migration upon inhibition of IGF-1R with Linsitinib (**Fig.7F-H**). Thus, our analyses  
584 clearly establish that EHD1 overexpression, by sustaining elevated levels of total and cell surface IGF-1R,



585 promotes multiple aspects of oncogenesis in EWS. While signaling through IGF-1R is well established to  
586 promote oncogenesis in EWS <sup>35</sup>, we directly establish that elevation of IGF-1R levels and subsequent  
587 IGF-1R-mediated signaling underlies the ability of EHD1 to promote the oncogenic behavior of EWS  
588 cells. Using the mEHD1-overexpressing SK-ES-1 cell model of EHD1-driven elevation of oncogenic  
589 behavior (**Fig. 1J-M**), our multi-pronged studies using siRNA KD, kinase inhibition, and an inhibitory  
590 antibody approach demonstrates a requirement of IGF-1R for EHD1 overexpression-driven oncogenic  
591 traits (**Fig.8A-I**). Thus, our studies clearly establish the upregulation of IGF-1R levels and signaling by  
592 overexpressed EHD1 as a key oncogenic adaptation in EWS. Consistent with this conclusion, analysis of  
593 a large cohort of EWS patient samples showed a significant positive correlation between EHD1 and IGF-  
594 1R protein levels (**Fig. 8F-H**).

595 Our findings using an EWS model have potential implications for the pro-oncogenic role of  
596 EHD1 and RTK-dependent sustenance of tumorigenesis and metastasis in other cancers. EHD1  
597 overexpression is linked to shorter survival and chemotherapy/EGFR-TKI resistance in NSCLC <sup>16</sup>,  
598 apparently through PI3K-AKT pathway activation by interaction with the microtubule protein TUBB3  
599 and stabilization of microtubules <sup>16</sup> and through promotion of aerobic glycolysis via a 14-3-3z-dependent  
600 b-catenin-c-Myc activation pathway <sup>14</sup>. While these mechanisms may operate independently of RTK  
601 signaling, the key roles of the wildtype or mutant EGFR, as well as IGF-1R and other RTKs, in NSCLC  
602 pathogenesis and therapeutic resistance <sup>65</sup> raise the possibility that EHD1 overexpression activates these  
603 pathways by sustaining RTKs, as we show in the EWS model. Association of EHD1 overexpression with  
604 EGFR-TKI resistance in NSCLC <sup>11, 16</sup> and with higher expression of EGFR, phospho-EGFR and RAB11-  
605 FIP3 <sup>12</sup> support this idea.

606 While our studies focus on the linkage of EHD1 with an RTK, EHD1 overexpression may also  
607 regulate other oncogenesis-related cell surface receptors, given its broader roles. Indeed, EHD1  
608 overexpression was shown to promote cancer stem cell-like traits in glioblastoma and lung cancer by  
609 promoting CD44 recycling while suppressing its degradation <sup>15, 66</sup>, promote cisplatin resistance in NSCLC

610 by regulating cisplatin accumulation in cells, presumably by regulating transporter levels <sup>9</sup>, and potentiate  
611 angiogenesis by promoting  $\beta_2$  adrenergic receptor recycling <sup>13</sup>. Cell biological studies have also shown a  
612 positive role of EHD1 in  $\beta_1$  integrin recycling <sup>53</sup>. Future studies of the kind described here in the context  
613 of an RTK, IGF-1R, should help uncover the individual or combined roles of the various EHD1-regulated  
614 cell surface receptors in promoting tumorigenesis and metastasis.

615 In conclusion, our analyses in an EWS tumor model show that EHD1 overexpression promotes  
616 oncogenesis by post-translationally upregulating the trafficking itinerary of an RTK, IGF-1R.

617

618 **ACKNOWLEDGEMENTS:** This research was funded by: Pilot grants from the Pediatric Cancer  
619 Research Program of the Children's Hospital Research Institute, UNMC; Pilot grants from the Fred &  
620 Pamela Buffett Cancer Center (HB & VB); Department of Defense grants W81XWH-17-1-0616 and  
621 W81XWH-20-1-0058 to HB and W81XWH-20-1-0546 to VB; the NIH grants R21CA241055 and  
622 R03CA253193 to VB; the Raphael Bonita Memorial Fund; and support to UNMC core facilities from the  
623 NCI Cancer Center Support Grant (P30CA036727) awarded to Fred & Pamela Buffett Cancer Center and  
624 from the Nebraska Research Initiative. SC and AMB received the University of Nebraska Medical Center  
625 Graduate Student Fellowships.

626 **AUTHOR CONTRIBUTIONS:** Designing research studies: S.C., H.B., V.B., B.C.M. Conducting  
627 experiments: S.C., A.M.B., I.M., H.L., B.C.M. Acquiring and analyzing data: S.C., B.C.M., A.K., S.M.,  
628 N.C., J.A.L., A.L.B., I.M., J.L.M, D.W.C., J.M.R. Providing reagents: M.D.S., G.G. Writing the  
629 manuscript: S.C., H.B. All authors have read and agreed to the version of manuscript.

630 **CONFLICT OF INTEREST DISCLOSURE STATEMENT:** Dr. H. Band and Dr. V. Band received  
631 funding from Nimbus Therapeutics for an unrelated project.

632

633 **REFERENCES**

- 634 1. Naslavsky N, Caplan S. EHD proteins: key conductors of endocytic transport. *Trends Cell Biol* **21**,  
635 122-131 (2011).
- 636  
637 2. George M, *et al.* Shared as well as distinct roles of EHD proteins revealed by biochemical and  
638 functional comparisons in mammalian cells and *C. elegans*. *BMC Cell Biol* **8**, 3 (2007).
- 639  
640 3. Daumke O, Lundmark R, Vallis Y, Martens S, Butler PJ, McMahon HT. Architectural and  
641 mechanistic insights into an EHD ATPase involved in membrane remodelling. *Nature* **449**, 923-  
642 927 (2007).
- 643  
644 4. Cypher LR, *et al.* CSF-1 receptor signalling is governed by pre-requisite EHD1 mediated receptor  
645 display on the macrophage cell surface. *Cell Signal* **28**, 1325-1335 (2016).
- 646  
647 5. Tom EC, *et al.* EHD1 and RUSC2 Control Basal Epidermal Growth Factor Receptor Cell Surface  
648 Expression and Recycling. *Mol Cell Biol* **40**, (2020).
- 649  
650 6. Lu H, Meng Q, Wen Y, Hu J, Zhao Y, Cai L. Increased EHD1 in non-small cell lung cancer predicts  
651 poor survival. *Thorac Cancer* **4**, 422-432 (2013).
- 652  
653 7. Gao Y, Wang Y, Sun L, Meng Q, Cai L, Dong X. Expression of TGF $\beta$ -1 and EHD1 correlated with  
654 survival of non-small cell lung cancer. *Tumour Biol* **35**, 9371-9380 (2014).
- 655  
656 8. Meng Q, *et al.* Mammalian Eps15 homology domain 1 promotes metastasis in non-small cell  
657 lung cancer by inducing epithelial-mesenchymal transition. *Oncotarget* **8**, 22433-22442 (2017).
- 658  
659 9. Gao J, Meng Q, Zhao Y, Chen X, Cai L. EHD1 confers resistance to cisplatin in non-small cell lung  
660 cancer by regulating intracellular cisplatin concentrations. *BMC Cancer* **16**, 470 (2016).
- 661  
662 10. Tong D, *et al.* Increased Eps15 homology domain 1 and RAB11FIP3 expression regulate breast  
663 cancer progression via promoting epithelial growth factor receptor recycling. *Tumour Biol* **39**,  
664 1010428317691010 (2017).
- 665  
666 11. Wang X, *et al.* NF- $\kappa$ B-driven improvement of EHD1 contributes to erlotinib resistance in EGFR-  
667 mutant lung cancers. *Cell Death Dis* **9**, 418-418 (2018).
- 668  
669 12. Liu Y, *et al.* Eps15 homology domain 1 promotes the evolution of papillary thyroid cancer by  
670 regulating endocytotic recycling of epidermal growth factor receptor. *Oncol Lett* **16**, 4263-4270  
671 (2018).

- 672  
673 13. Wang T, *et al.* Mammalian Eps15 homology domain 1 potentiates angiogenesis of non-small cell  
674 lung cancer by regulating  $\beta$ 2AR signaling. *J Exp Clin Cancer Res* **38**, 174 (2019).
- 675  
676 14. Huang J, *et al.* A feedback circuit comprising EHD1 and 14-3-3 $\zeta$  sustains  $\beta$ -catenin/c-Myc-  
677 mediated aerobic glycolysis and proliferation in non-small cell lung cancer. *Cancer Lett* **520**, 12-  
678 25 (2021).
- 679  
680 15. Lu Y, Wang W, Tan S. EHD1 promotes the cancer stem cell (CSC)-like traits of glioma cells via  
681 interacting with CD44 and suppressing CD44 degradation. *Environ Toxicol* **37**, 2259-2268 (2022).
- 682  
683 16. Huang J, *et al.* Targeting the IL-1 $\beta$ /EHD1/TUBB3 axis overcomes resistance to EGFR-TKI in NSCLC.  
684 *Oncogene* **39**, 1739-1755 (2020).
- 685  
686 17. Jin W. The Role of Tyrosine Kinases as a Critical Prognostic Parameter and Its Targeted Therapies  
687 in Ewing Sarcoma. *Frontiers in Cell and Developmental Biology* **8**, (2020).
- 688  
689 18. Abella JV, Park M. Breakdown of endocytosis in the oncogenic activation of receptor tyrosine  
690 kinases. *Am J Physiol Endocrinol Metab* **296**, E973-984 (2009).
- 691  
692 19. Di Fiore PP, De Camilli P. Endocytosis and signaling. an inseparable partnership. *Cell* **106**, 1-4  
693 (2001).
- 694  
695 20. Sigismund S, Confalonieri S, Ciliberto A, Polo S, Scita G, Di Fiore PP. Endocytosis and signaling:  
696 cell logistics shape the eukaryotic cell plan. *Physiol Rev* **92**, 273-366 (2012).
- 697  
698 21. Mosesson Y, Mills GB, Yarden Y. Derailed endocytosis: an emerging feature of cancer. *Nat Rev*  
699 *Cancer* **8**, 835-850 (2008).
- 700  
701 22. Grier HE. The Ewing family of tumors. Ewing's sarcoma and primitive neuroectodermal tumors.  
702 *Pediatr Clin North Am* **44**, 991-1004 (1997).
- 703  
704 23. Vornicova O, Bar-Sela G. Investigational therapies for Ewing sarcoma: a search without a clear  
705 finding. *Expert Opinion on Investigational Drugs* **25**, 679-686 (2016).
- 706  
707 24. Ginsberg JP, *et al.* EWS-FLI1 and EWS-ERG gene fusions are associated with similar clinical  
708 phenotypes in Ewing's sarcoma. *J Clin Oncol* **17**, (1999).
- 709  
710 25. Miser JS, *et al.* Treatment of metastatic Ewing's sarcoma or primitive neuroectodermal tumor of  
711 bone: evaluation of combination ifosfamide and etoposide--a Children's Cancer Group and  
712 Pediatric Oncology Group study. *J Clin Oncol* **22**, (2004).

- 713  
714 26. Siligan C, *et al.* EWS-FLI1 target genes recovered from Ewing's sarcoma chromatin. *Oncogene* **24**,  
715 (2005).
- 716  
717 27. Herrero-Martin D, *et al.* Stable interference of EWS-FLI1 in an Ewing sarcoma cell line impairs  
718 IGF-1/IGF-1R signalling and reveals TOPK as a new target. *Br J Cancer* **101**, (2009).
- 719  
720 28. Toretsky JA, Kalebic T, Blakesley V, LeRoith D, Helman LJ. The insulin-like growth factor-I  
721 receptor is required for EWS/FLI-1 transformation of fibroblasts. *J Biol Chem* **272**, 30822-30827  
722 (1997).
- 723  
724 29. Cironi L, *et al.* IGF1 is a common target gene of Ewing's sarcoma fusion proteins in mesenchymal  
725 progenitor cells. *PLoS One* **3**, e2634 (2008).
- 726  
727 30. Prieur A, Tirode F, Cohen P, Delattre O. EWS/FLI-1 silencing and gene profiling of Ewing cells  
728 reveal downstream oncogenic pathways and a crucial role for repression of insulin-like growth  
729 factor binding protein 3. *Mol Cell Biol* **24**, 7275-7283 (2004).
- 730  
731 31. Osher E, Macaulay VM. Therapeutic Targeting of the IGF Axis. *Cells* **8**, (2019).
- 732  
733 32. Brahmkhatri VP, Prasanna C, Atreya HS. Insulin-like growth factor system in cancer: novel  
734 targeted therapies. *Biomed Res Int* **2015**, 538019 (2015).
- 735  
736 33. Christopoulos PF, Msaouel P, Koutsilieris M. The role of the insulin-like growth factor-1 system  
737 in breast cancer. *Mol Cancer* **14**, 43 (2015).
- 738  
739 34. Arcaro A. Targeting the insulin-like growth factor-1 receptor in human cancer. *Front Pharmacol*  
740 **4**, 30 (2013).
- 741  
742 35. Scotlandi K, *et al.* Insulin-like growth factor I receptor-mediated circuit in Ewing's  
743 sarcoma/peripheral neuroectodermal tumor: a possible therapeutic target. *Cancer Res* **56**, 4570-  
744 4574 (1996).
- 745  
746 36. Juergens H, *et al.* Preliminary efficacy of the anti-insulin-like growth factor type 1 receptor  
747 antibody figitumumab in patients with refractory Ewing sarcoma. *J Clin Oncol* **29**, 4534-4540  
748 (2011).
- 749  
750 37. Anderson PM, *et al.* A phase II study of clinical activity of SCH 717454 (robatumumab) in patients  
751 with relapsed osteosarcoma and Ewing sarcoma. *Pediatr Blood Cancer* **63**, 1761-1770 (2016).
- 752

- 753 38. Tolcher AW, *et al.* Phase I, pharmacokinetic, and pharmacodynamic study of AMG 479, a fully  
754 human monoclonal antibody to insulin-like growth factor receptor 1. *J Clin Oncol* **27**, 5800-5807  
755 (2009).
- 756  
757 39. Olmos D, *et al.* Safety, pharmacokinetics, and preliminary activity of the anti-IGF-1R antibody  
758 figitumumab (CP-751,871) in patients with sarcoma and Ewing's sarcoma: a phase 1 expansion  
759 cohort study. *Lancet Oncol* **11**, 129-135 (2010).
- 760  
761 40. Kurzrock R, *et al.* A phase I study of weekly R1507, a human monoclonal antibody insulin-like  
762 growth factor-I receptor antagonist, in patients with advanced solid tumors. *Clin Cancer Res* **16**,  
763 2458-2465 (2010).
- 764  
765 41. Malempati S, *et al.* Phase I/II trial and pharmacokinetic study of cixutumumab in pediatric  
766 patients with refractory solid tumors and Ewing sarcoma: a report from the Children's Oncology  
767 Group. *J Clin Oncol* **30**, 256-262 (2012).
- 768  
769 42. Murakami H, *et al.* Phase 1 study of ganitumab (AMG 479), a fully human monoclonal antibody  
770 against the insulin-like growth factor receptor type I (IGF1R), in Japanese patients with advanced  
771 solid tumors. *Cancer Chemother Pharmacol* **70**, 407-414 (2012).
- 772  
773 43. Schoffski P, *et al.* An open-label, phase 2 study evaluating the efficacy and safety of the anti-IGF-  
774 1R antibody cixutumumab in patients with previously treated advanced or metastatic soft-tissue  
775 sarcoma or Ewing family of tumours. *Eur J Cancer* **49**, 3219-3228 (2013).
- 776  
777 44. Qu X, *et al.* Update of IGF-1 receptor inhibitor (ganitumab, dalotuzumab, cixutumumab,  
778 teprotumumab and figitumumab) effects on cancer therapy. *Oncotarget* **8**, 29501-29518 (2017).
- 779  
780 45. Baserga R. The decline and fall of the IGF-I receptor. *J Cell Physiol* **228**, 675-679 (2013).
- 781  
782 46. Ebinger S, *et al.* Characterization of Rare, Dormant, and Therapy-Resistant Cells in Acute  
783 Lymphoblastic Leukemia. *Cancer Cell* **30**, 849-862 (2016).
- 784  
785 47. Naslavsky N, Rahajeng J, Sharma M, Jovic M, Caplan S. Interactions between EHD proteins and  
786 Rab11-FIP2: a role for EHD3 in early endosomal transport. *Mol Biol Cell* **17**, 163-177 (2006).
- 787  
788 48. Rotem-Yehudar R, Galperin E, Horowitz M. Association of insulin-like growth factor 1 receptor  
789 with EHD1 and SNAP29. *J Biol Chem* **276**, 33054-33060 (2001).
- 790  
791 49. Crudden C, *et al.* Below the Surface: IGF-1R Therapeutic Targeting and Its Endocytic Journey.  
792 *Cells* **8**, (2019).
- 793

- 794 50. Fernando R, Caldera O, Smith TJ. Therapeutic IGF-I receptor inhibition alters fibrocyte immune  
795 phenotype in thyroid-associated ophthalmopathy. *Proc Natl Acad Sci U S A* **118**, (2021).
- 796
- 797 51. Li SL, Kato J, Paz IB, Kasuya J, Fujita-Yamaguchi Y. Two new monoclonal antibodies against the  
798 alpha subunit of the human insulin-like growth factor-I receptor. *Biochem Biophys Res Commun*  
799 **196**, 92-98 (1993).
- 800
- 801 52. Suva LJ, Washam C, Nicholas RW, Griffin RJ. Bone metastasis: mechanisms and therapeutic  
802 opportunities. *Nat Rev Endocrinol* **7**, 208-218 (2011).
- 803
- 804 53. Jović M, Naslavsky N, Rapaport D, Horowitz M, Caplan S. EHD1 regulates beta1 integrin  
805 endosomal transport: effects on focal adhesions, cell spreading and migration. *J Cell Sci* **120**,  
806 802-814 (2007).
- 807
- 808 54. Iseka FM, *et al.* Role of the EHD Family of Endocytic Recycling Regulators for TCR Recycling and T  
809 Cell Function. *J Immunol* **200**, 483-499 (2018).
- 810
- 811 55. Foti M, Moukil MA, Dudognon P, Carpentier JL. Insulin and IGF-1 receptor trafficking and  
812 signalling. *Novartis Found Symp* **262**, 125-141; discussion 141-127, 265-128 (2004).
- 813
- 814 56. de Groot S, Röttgering B, Gelderblom H, Pijl H, Szuhai K, Kroep JR. Unraveling the Resistance of  
815 IGF-Pathway Inhibition in Ewing Sarcoma. *Cancers (Basel)* **12**, (2020).
- 816
- 817 57. Rieger L, O'Connor R. Controlled Signaling-Insulin-Like Growth Factor Receptor Endocytosis and  
818 Presence at Intracellular Compartments. *Front Endocrinol (Lausanne)* **11**, 620013 (2020).
- 819
- 820 58. Romanelli RJ, LeBeau AP, Fulmer CG, Lazzarino DA, Hochberg A, Wood TL. Insulin-like growth  
821 factor type-I receptor internalization and recycling mediate the sustained phosphorylation of  
822 Akt. *J Biol Chem* **282**, 22513-22524 (2007).
- 823
- 824 59. Demonbreun AR, *et al.* Myoferlin is required for insulin-like growth factor response and muscle  
825 growth. *Faseb j* **24**, 1284-1295 (2010).
- 826
- 827 60. Essandoh K, *et al.* Tsg101 positively regulates physiologic-like cardiac hypertrophy through FIP3-  
828 mediated endosomal recycling of IGF-1R. *Faseb j* **33**, 7451-7466 (2019).
- 829
- 830 61. Chen G, *et al.* GIGYF1 disruption associates with autism and impaired IGF-1R signaling. *J Clin*  
831 *Invest* **132**, (2022).
- 832

- 833 62. Rieger L, O'Shea S, Godsmark G, Stanicka J, Kelly G, O'Connor R. IGF-1 receptor activity in the  
834 Golgi of migratory cancer cells depends on adhesion-dependent phosphorylation of Tyr(1250)  
835 and Tyr(1251). *Sci Signal* **13**, (2020).
- 836  
837 63. Agarwal NK, *et al.* Smoothened (SMO) regulates insulin-like growth factor 1 receptor (IGF1R)  
838 levels and protein kinase B (AKT) localization and signaling. *Lab Invest* **102**, 401-410 (2022).
- 839  
840 64. Bhattacharyya S, *et al.* Endocytic recycling protein EHD1 regulates primary cilia morphogenesis  
841 and SHH signaling during neural tube development. *Sci Rep* **6**, 20727 (2016).
- 842  
843 65. Gazdar AF. Activating and resistance mutations of EGFR in non-small-cell lung cancer: role in  
844 clinical response to EGFR tyrosine kinase inhibitors. *Oncogene* **28**, S24-S31 (2009).
- 845  
846 66. Liu Y, *et al.* A novel EHD1/CD44/Hippo/SP1 positive feedback loop potentiates stemness and  
847 metastasis in lung adenocarcinoma. *Clin Transl Med* **12**, e836 (2022).
- 848  
849 67. López-Guerrero JA, *et al.* Clinicopathological significance of cell cycle regulation markers in a  
850 large series of genetically confirmed Ewing's sarcoma family of tumors. *Int J Cancer* **128**, 1139-  
851 1150 (2011).
- 852  
853 68. Kim D, Paggi JM, Park C, Bennett C, Salzberg SL. Graph-based genome alignment and genotyping  
854 with HISAT2 and HISAT-genotype. *Nat Biotechnol* **37**, 907-915 (2019).
- 855  
856 69. Kovaka S, Zimin AV, Pertea GM, Razaghi R, Salzberg SL, Pertea M. Transcriptome assembly from  
857 long-read RNA-seq alignments with StringTie2. *Genome Biol* **20**, 278 (2019).
- 858  
859 70. Love MI, Huber W, Anders S. Moderated estimation of fold change and dispersion for RNA-seq  
860 data with DESeq2. *Genome Biol* **15**, 550 (2014).
- 861  
862



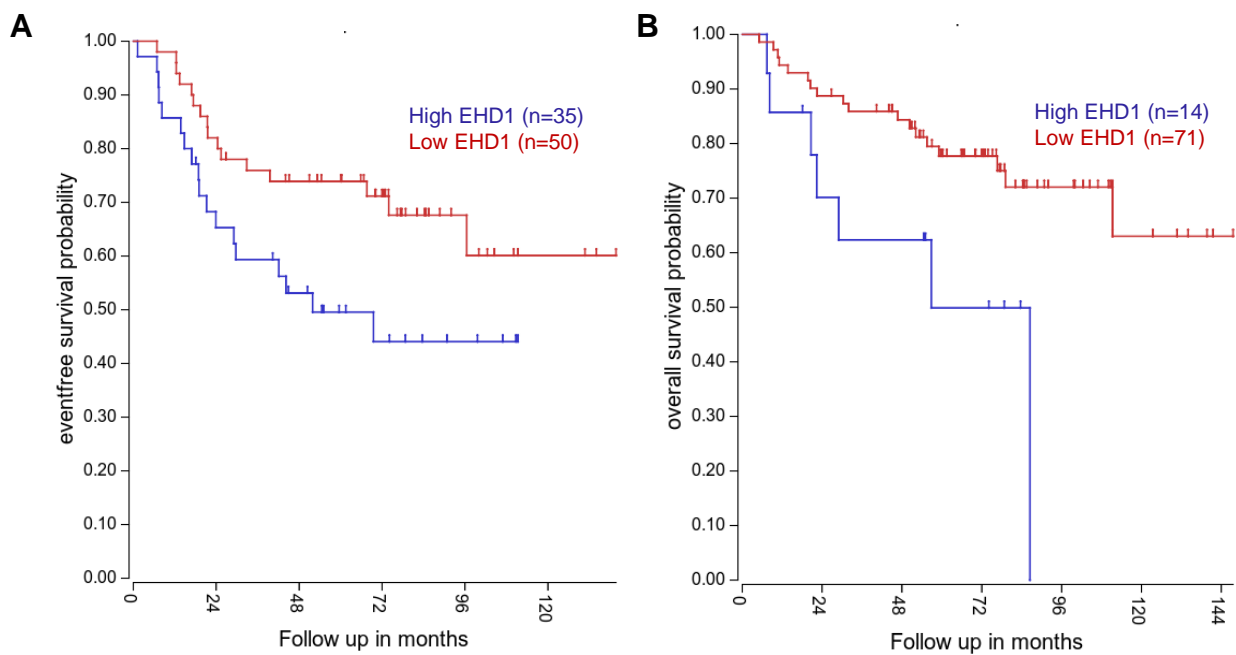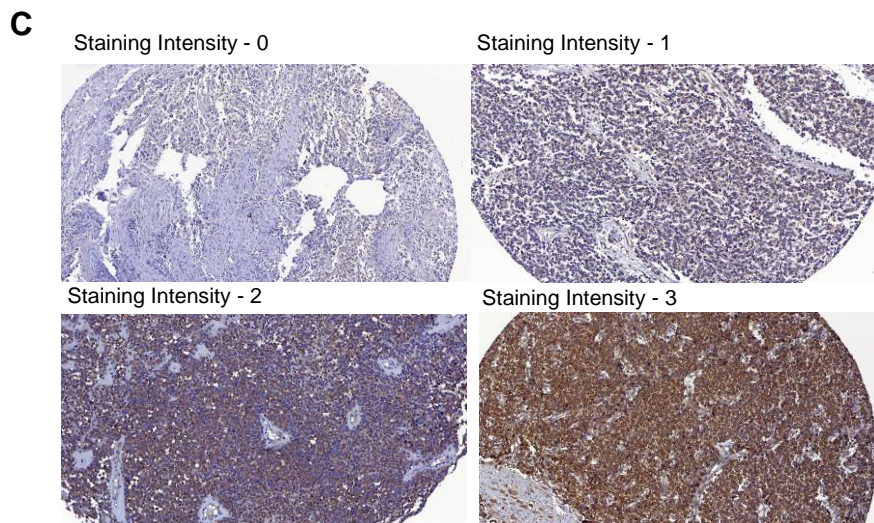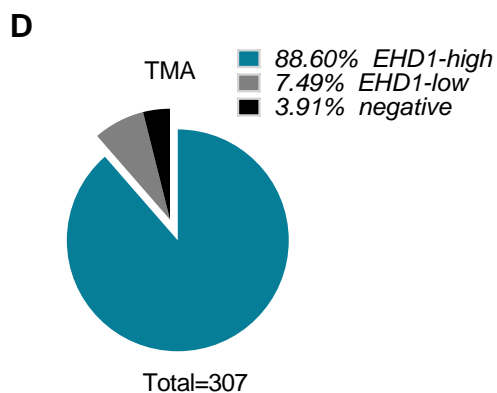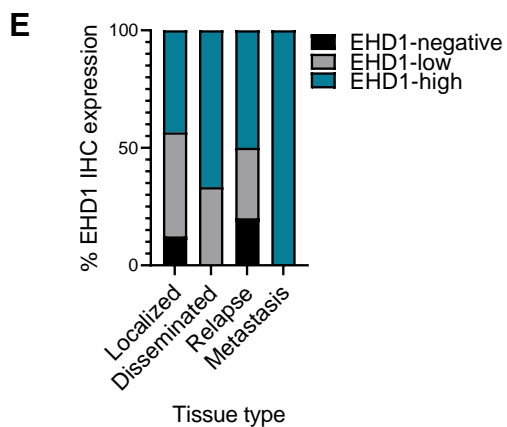

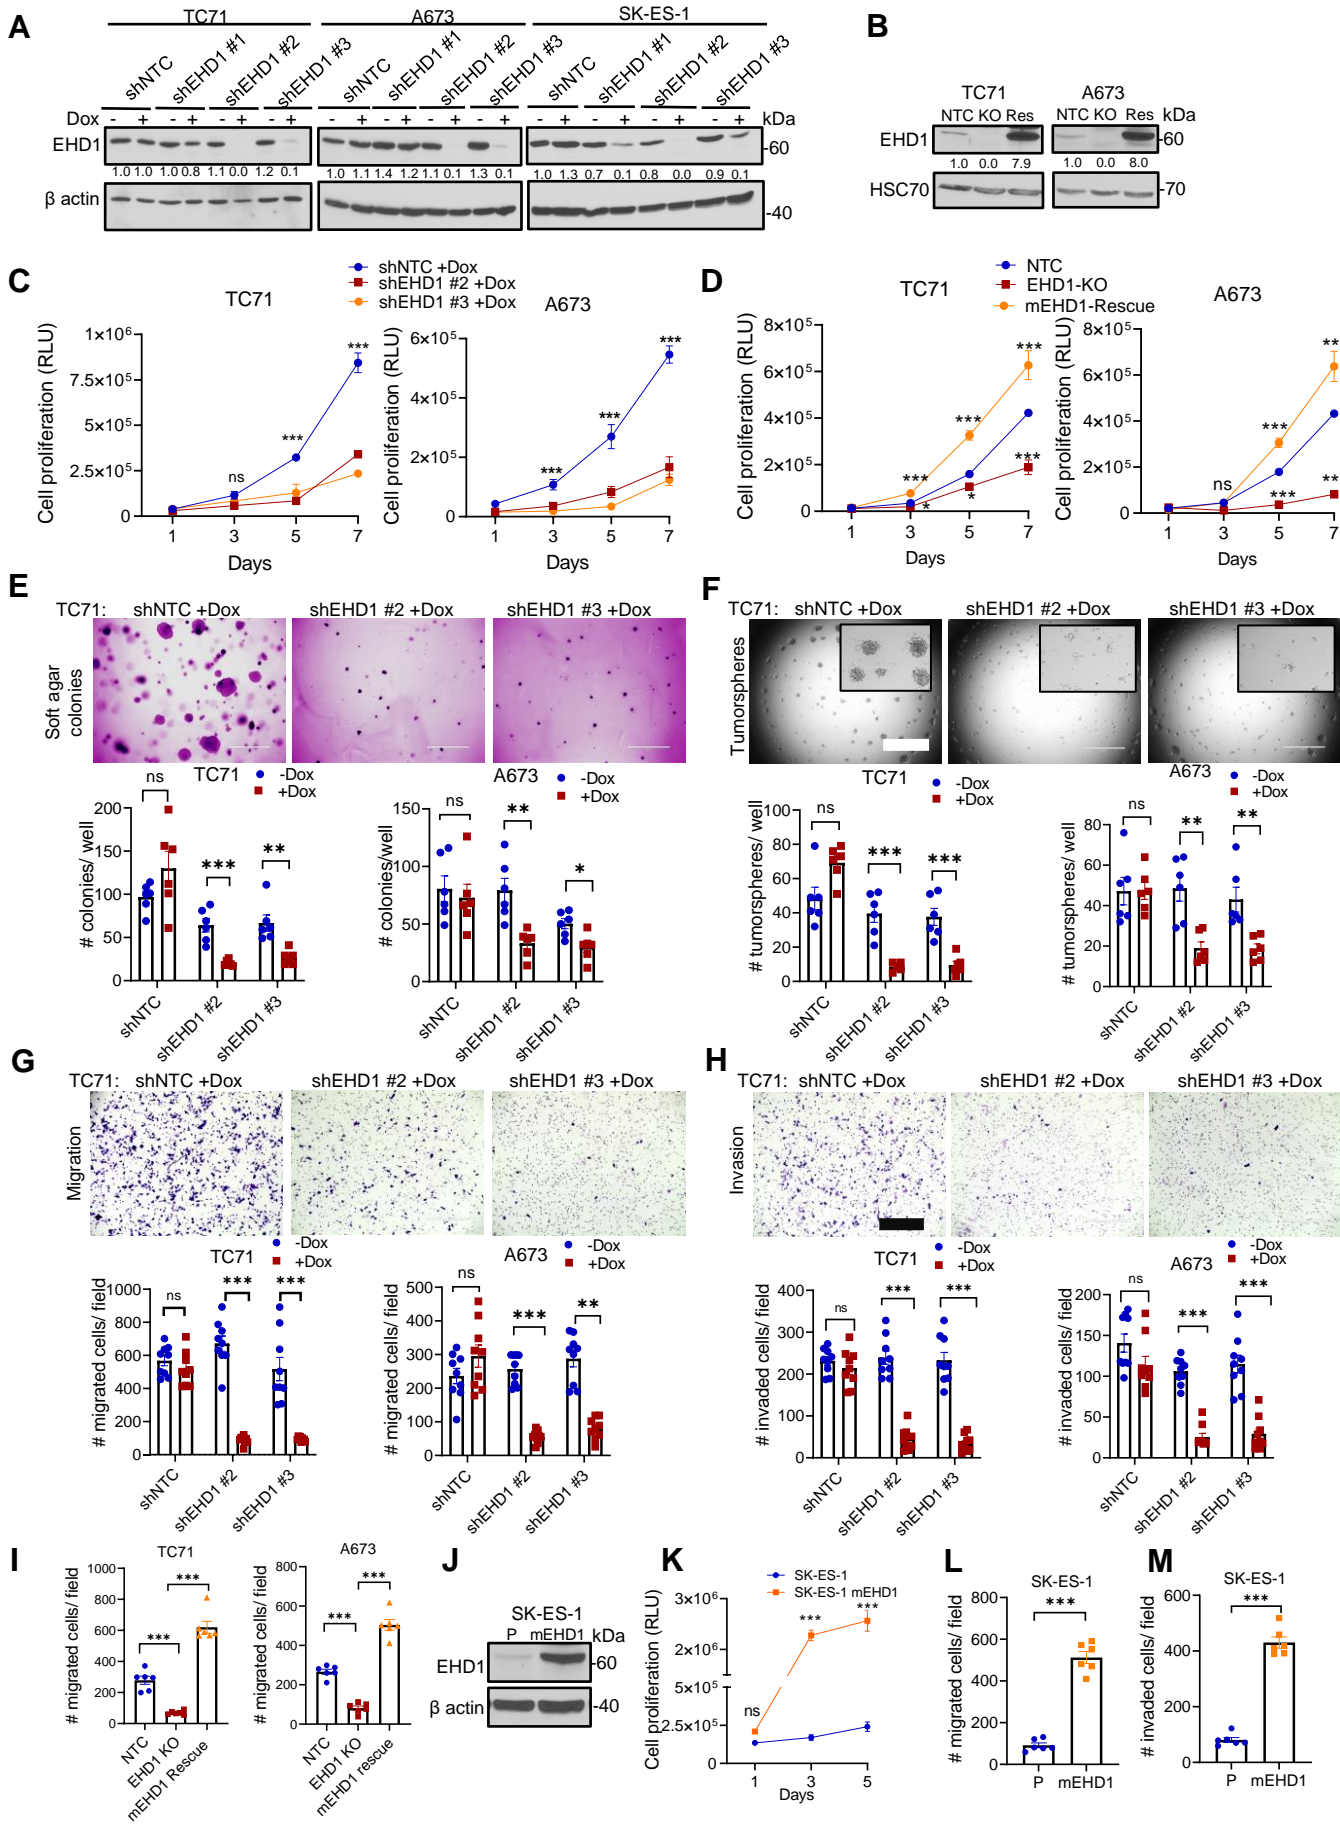

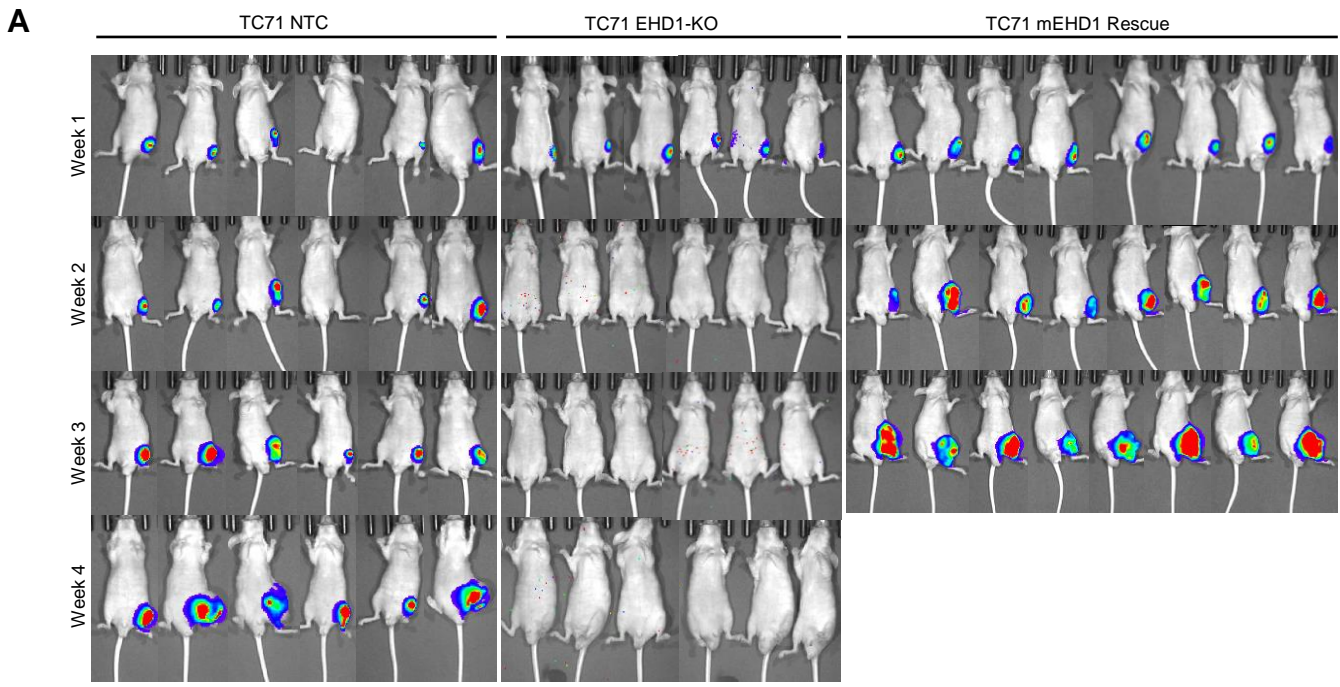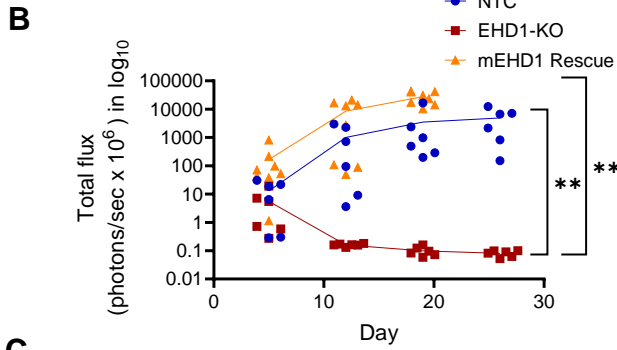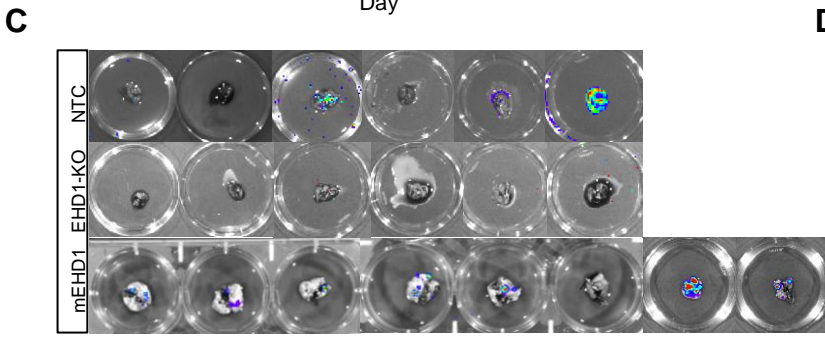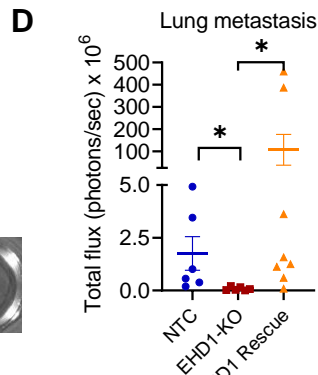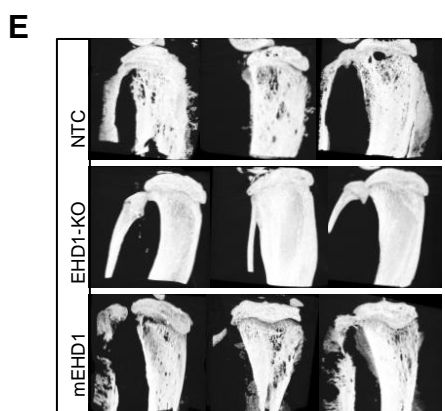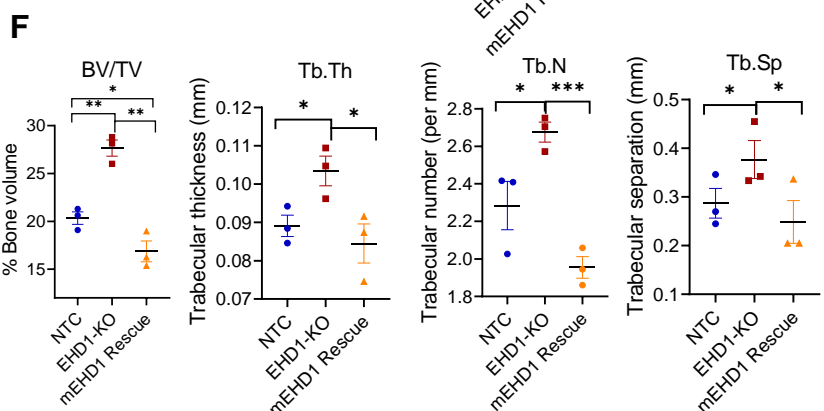

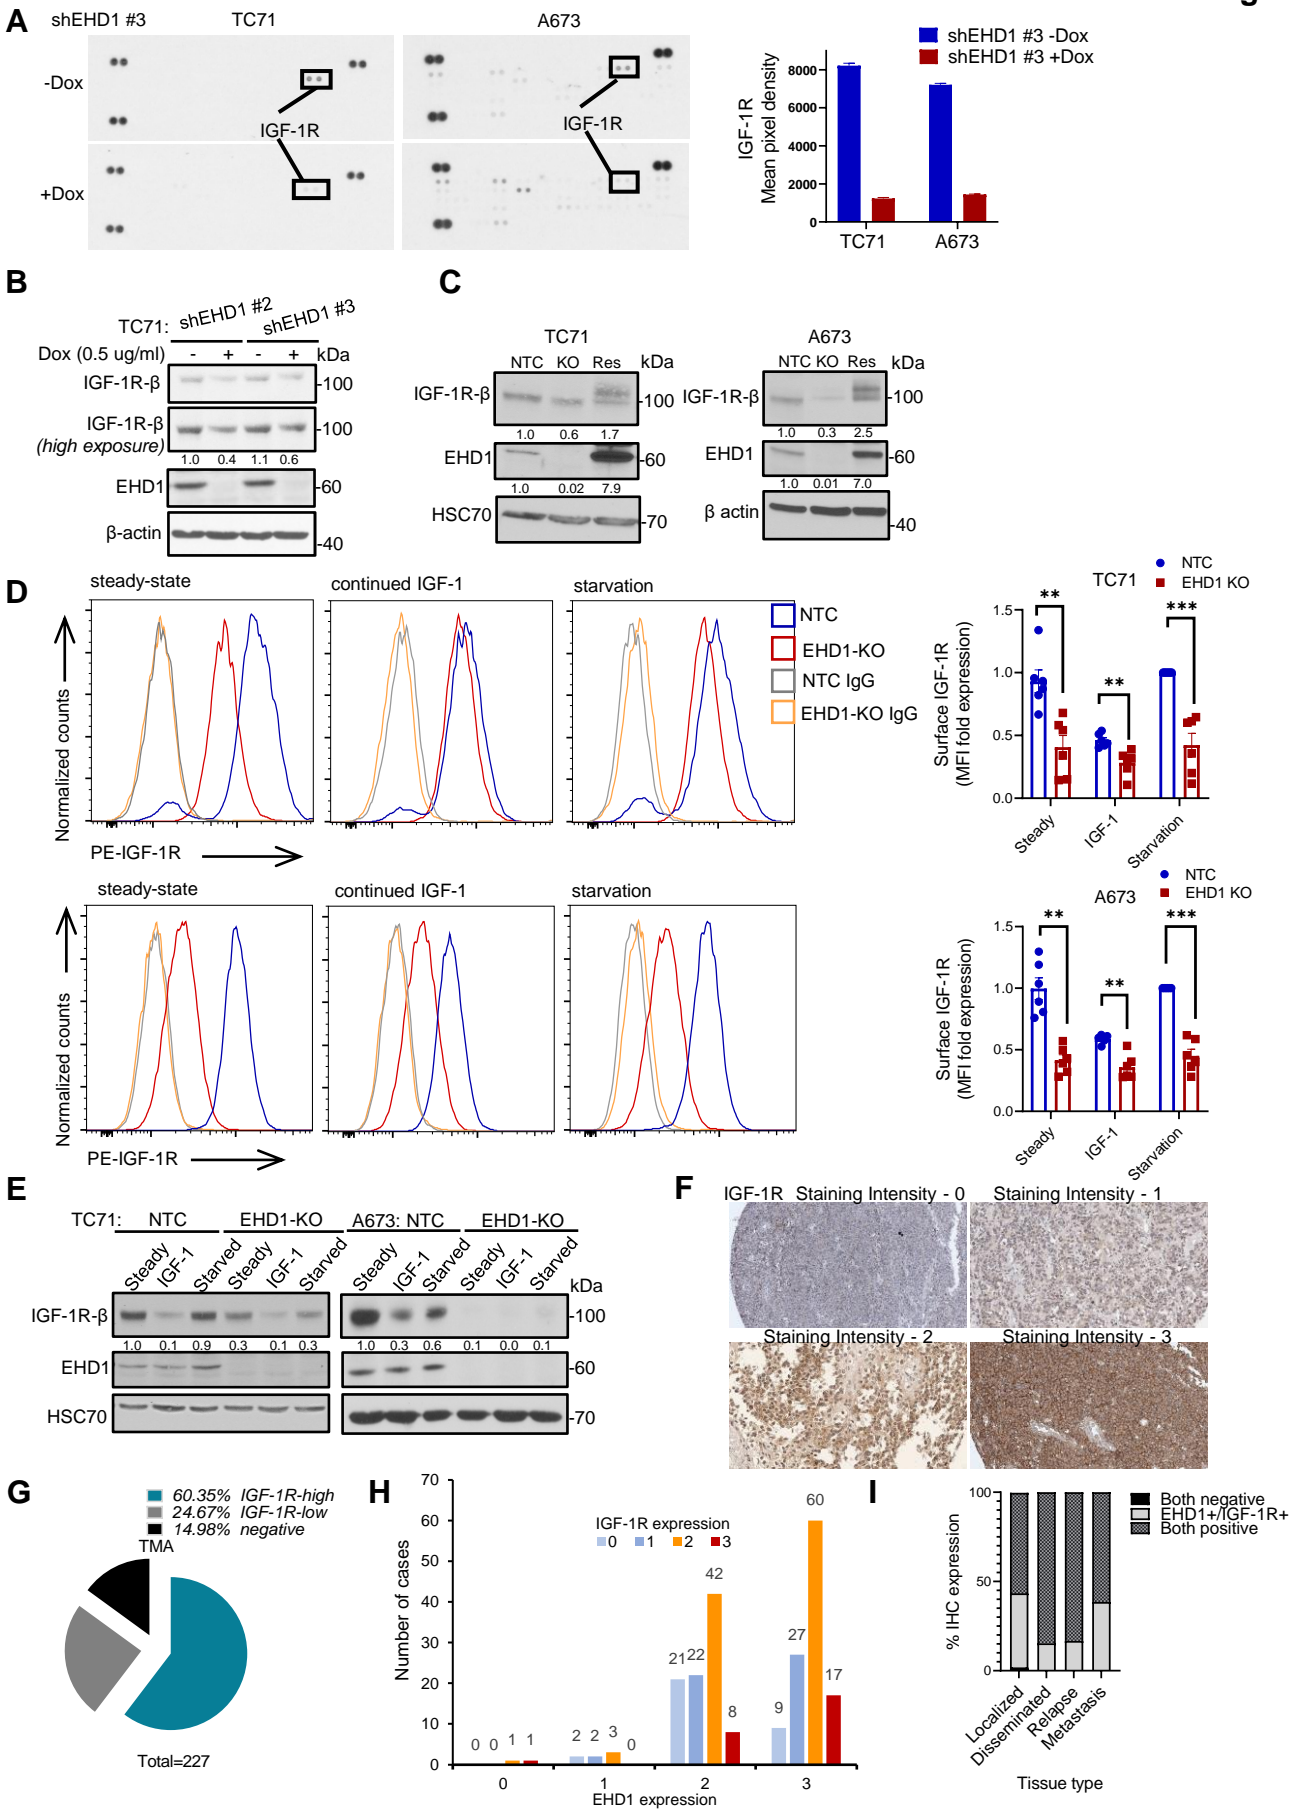

**A**

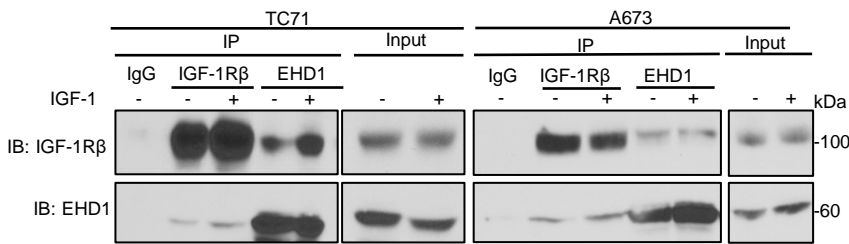

**B**

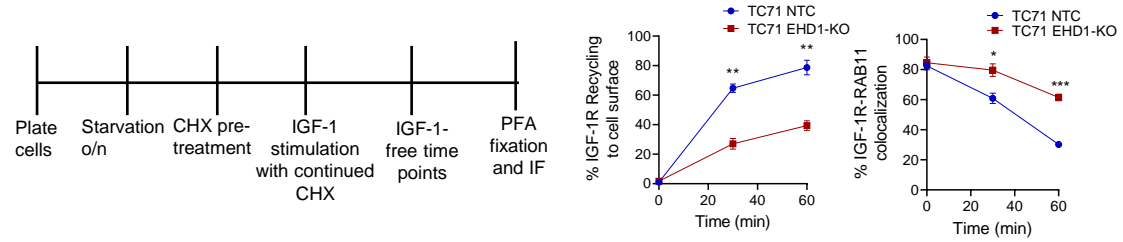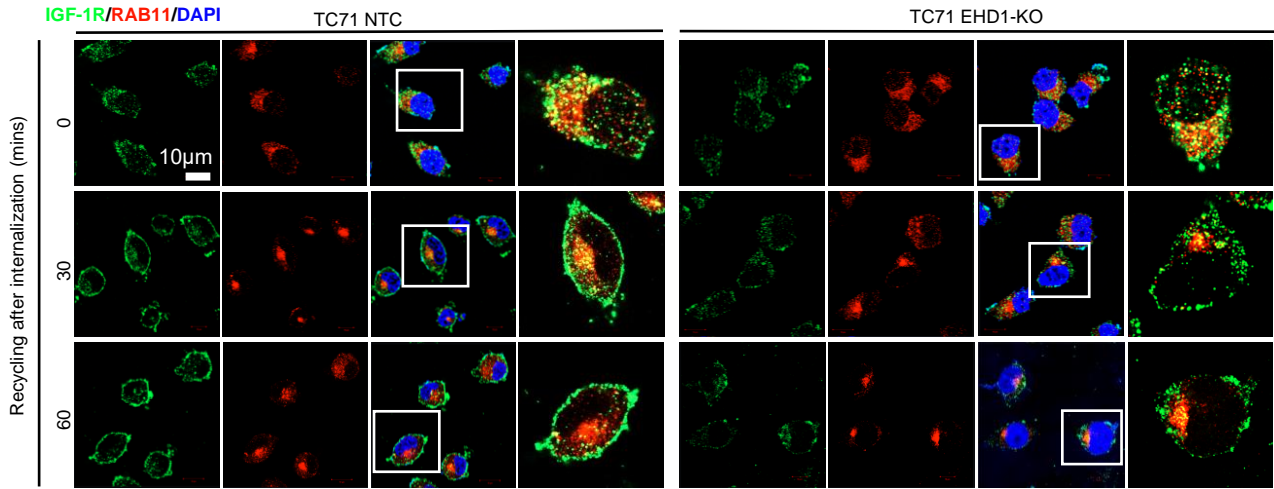

**C**

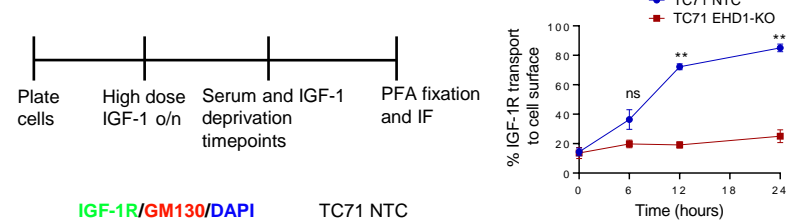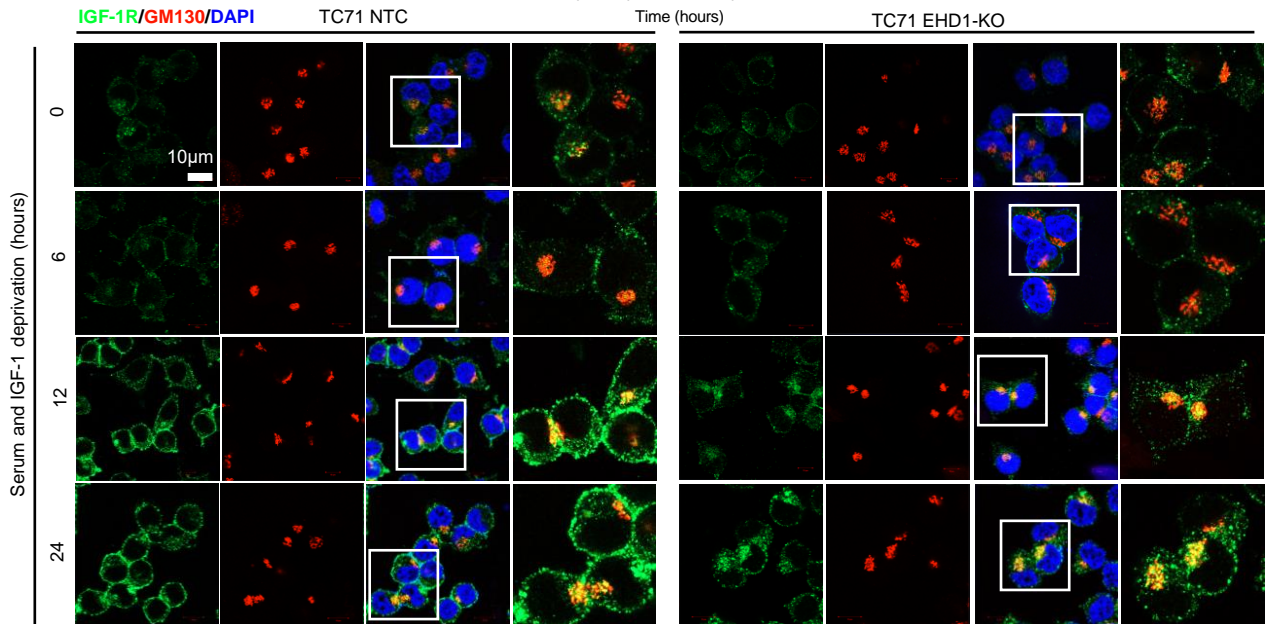

**A**

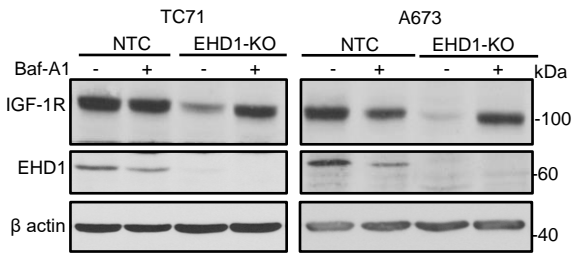

**B**

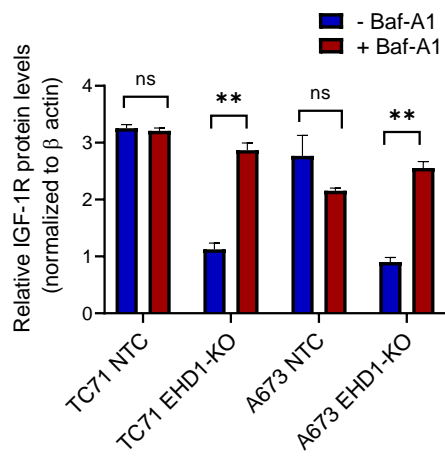

**C**

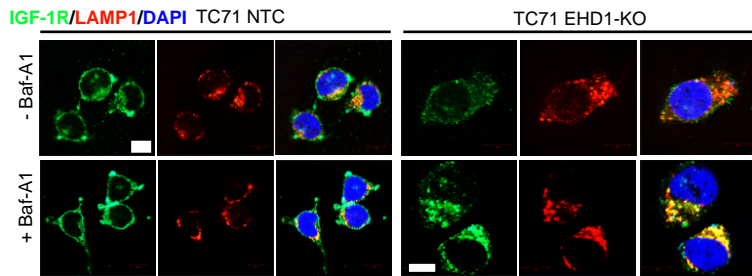

**E**

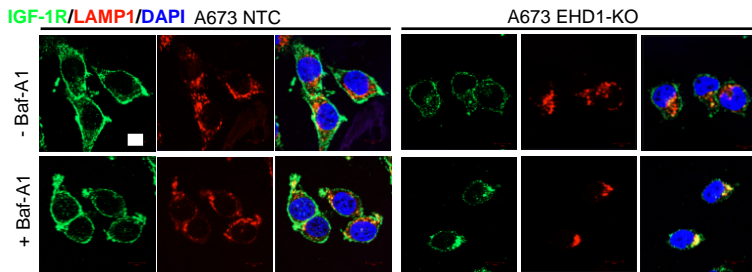

**D**

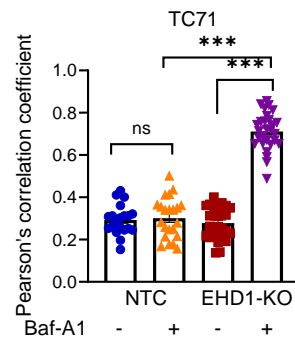

**F**

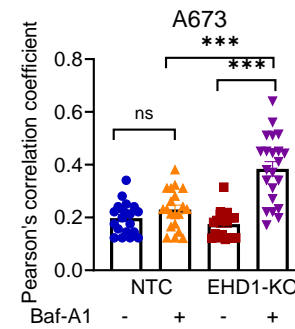

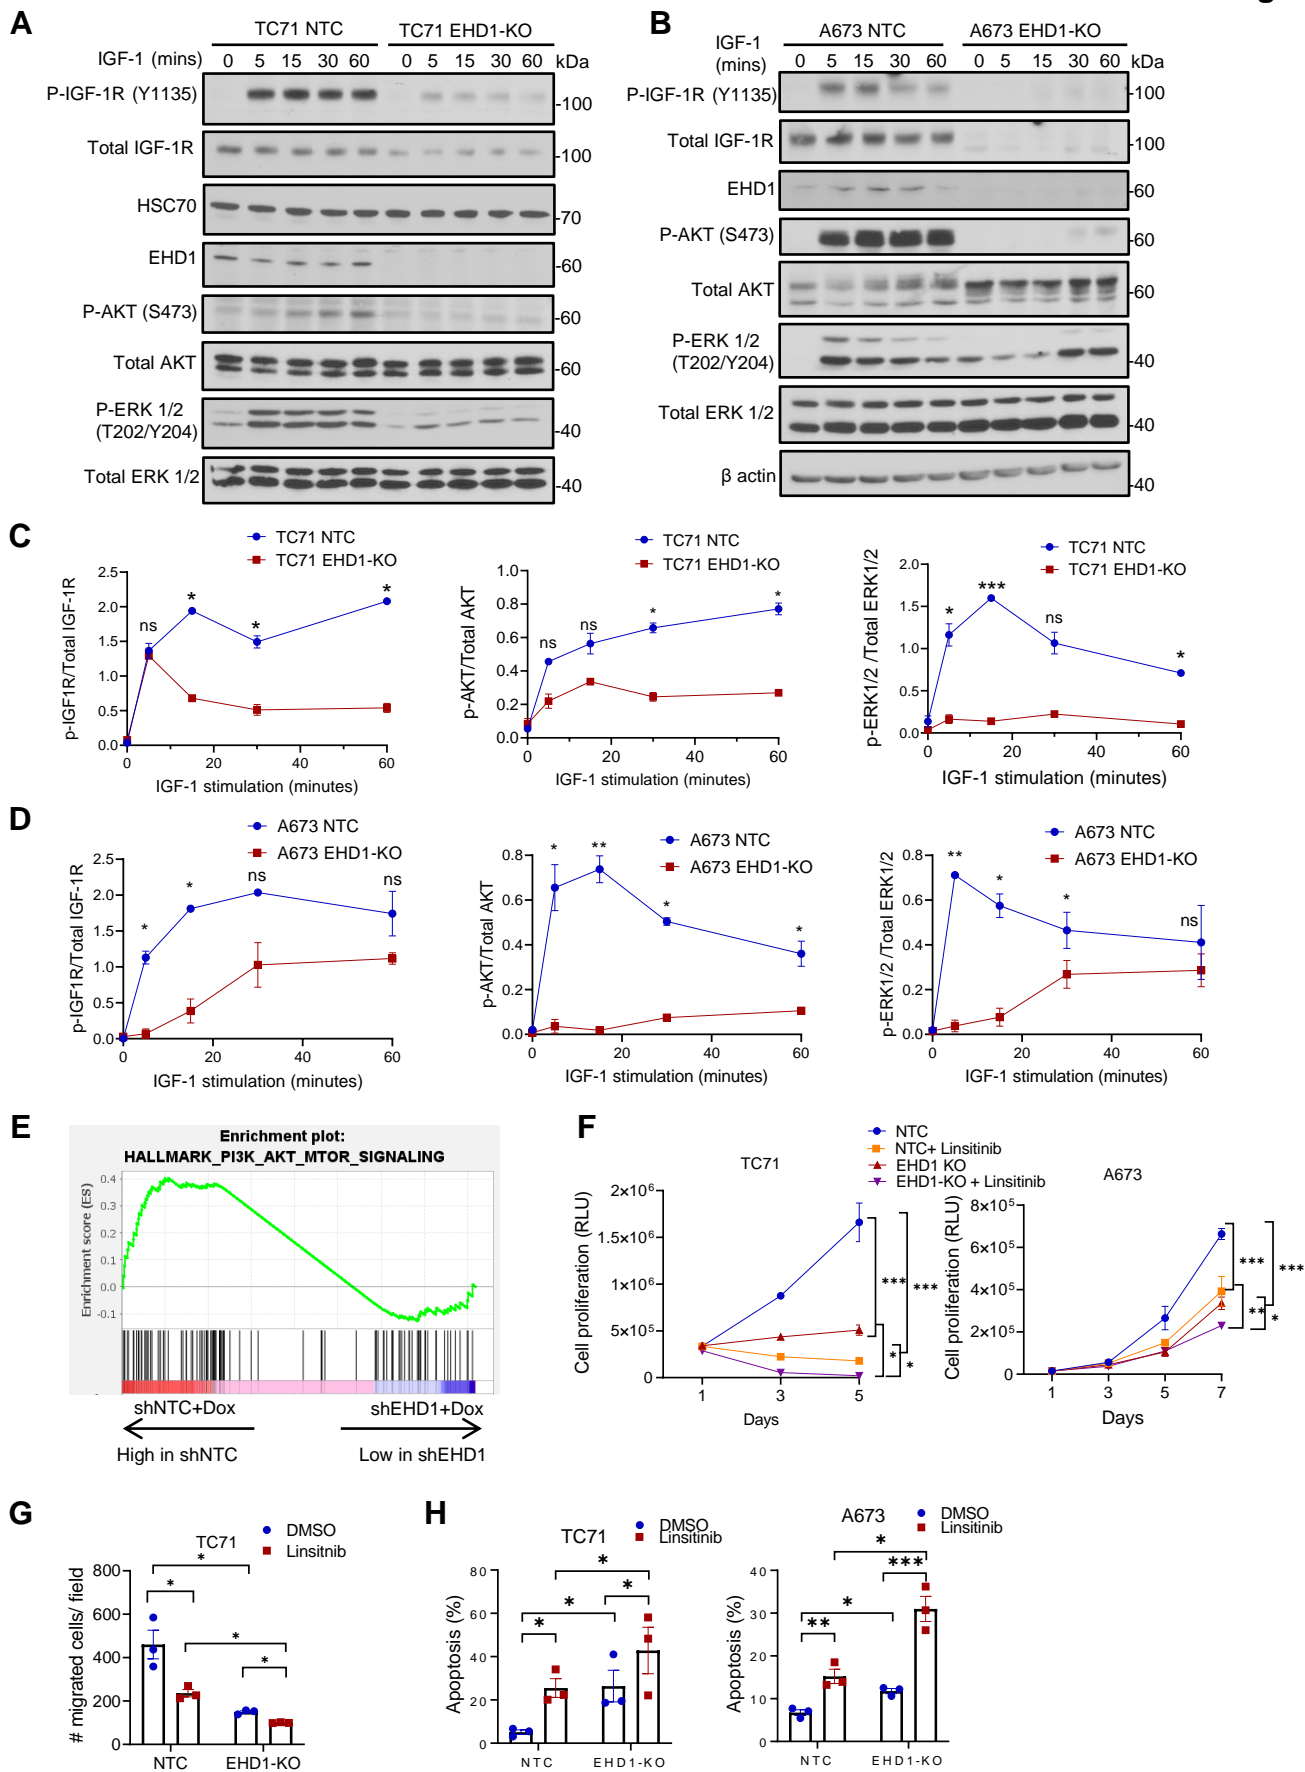

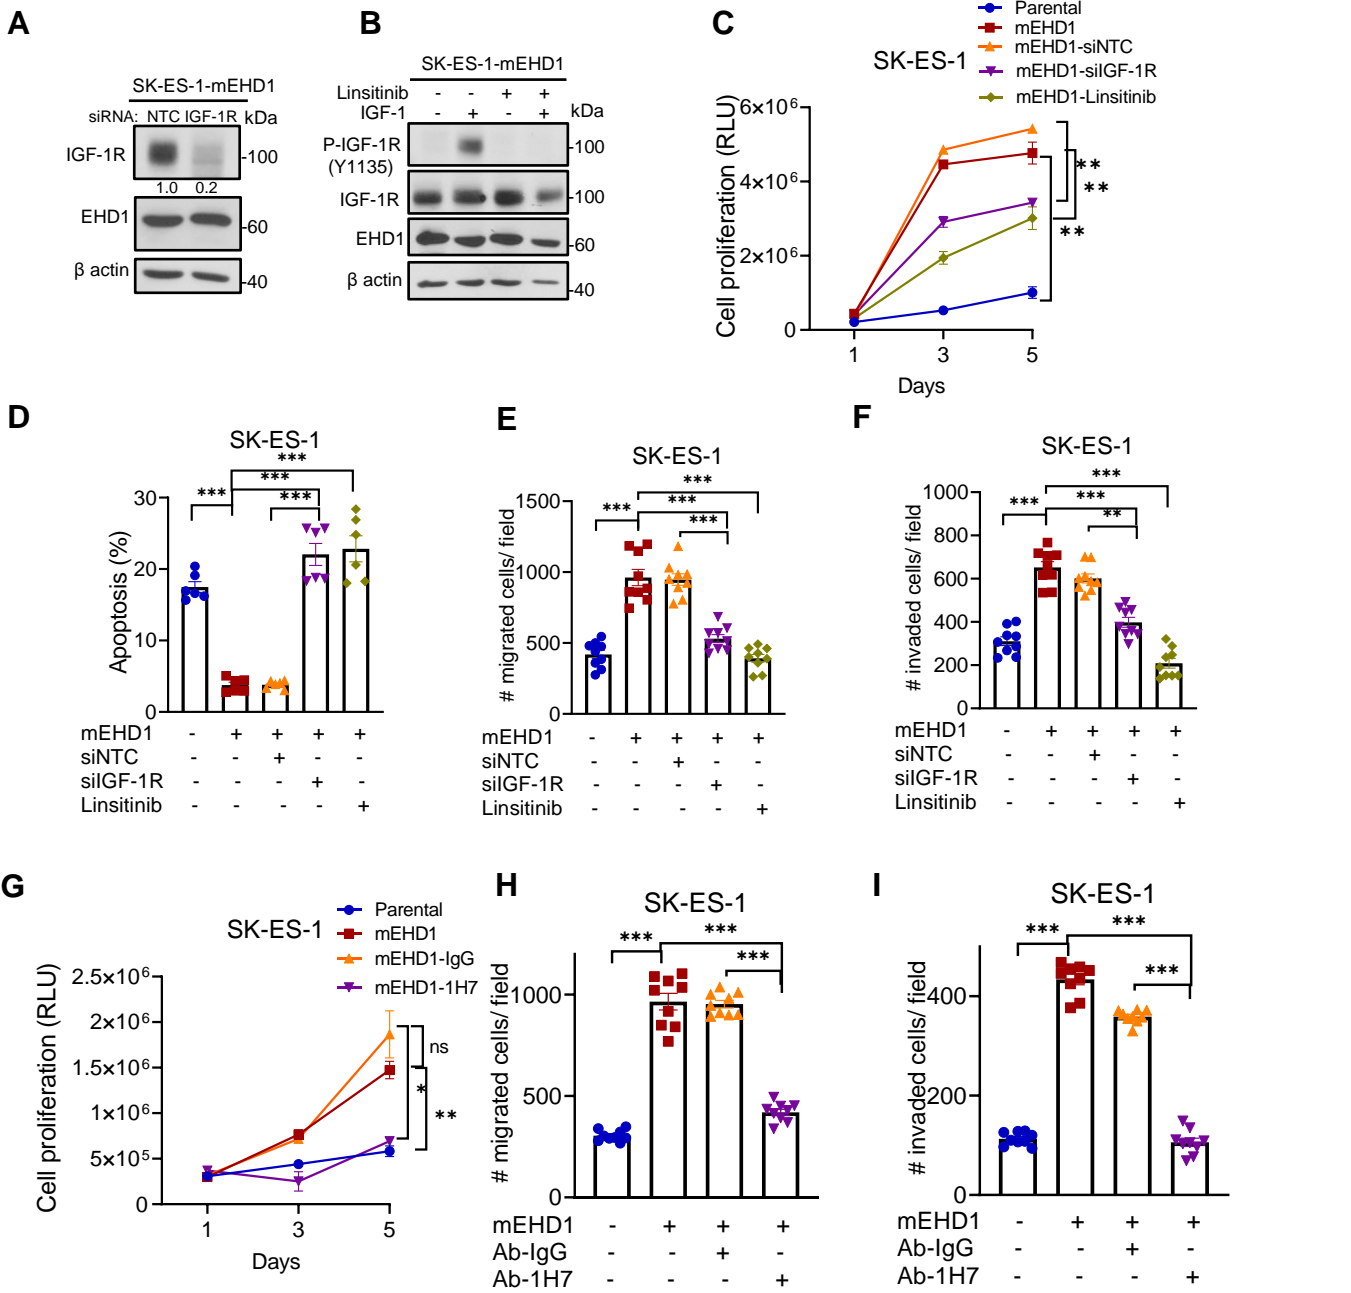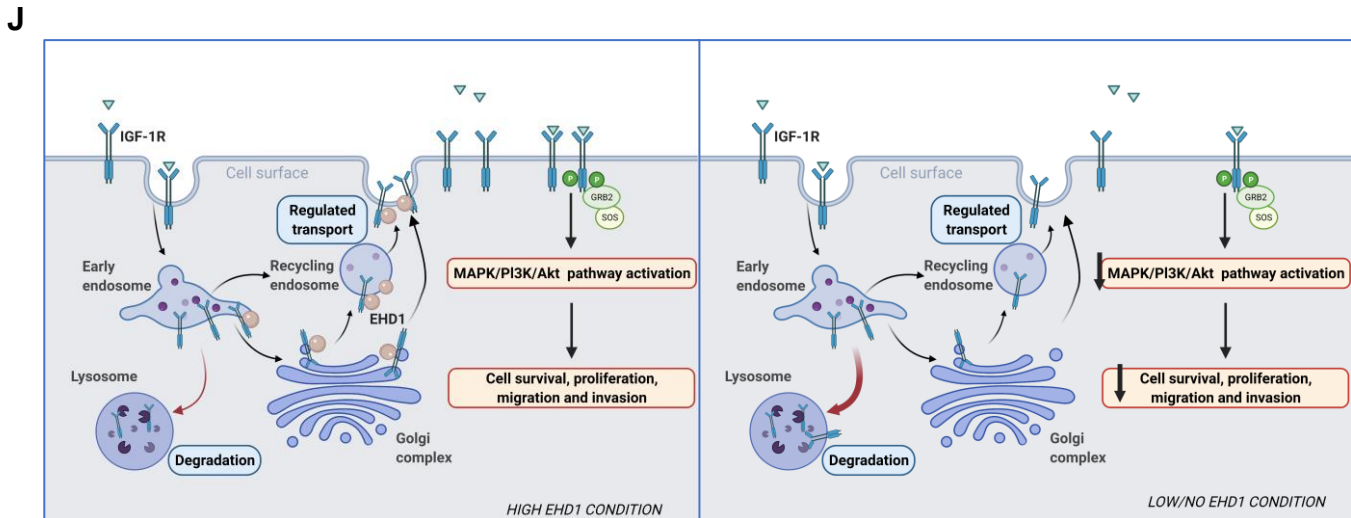



**Figure 1. EHD1 is overexpressed in Ewing Sarcoma patient tumors and its overexpression is associated with shorter survival. (A-B)** Kaplan-Meier survival analysis of 85 EWS patients based on publicly-available EHD1 mRNA expression using the R2 Genomics Analysis and Visualization Platform. EHD1-high (blue); EHD1-low (red). Event-free survival analysis (**A**;  $p=0.038$ ) used a dichotomization cut-off of 439.8 (right panel), with  $N=35$  for EHD1-high and  $N=50$  for EHD1-low group. Overall survival analysis (**B**;  $p=0.014$ ) used a dichotomization cut-off of 490.8 (right panel) with  $N=14$  for EHD1-high and  $N=71$  for EHD1-low groups. The dichotomization cutoffs represent the program-selected defaults based on statistical significance. (**C-D**) EHD1 overexpression in EWS patient primary tumor tissue microarrays examined by immunohistochemistry (IHC). (**C**) Representative examples of various intensities (on a scale of 0 to 3) of anti-EHD1 antibody staining; details in Methods. (**D**) Relative distribution of EHD1-high (staining intensity of 2 or 3), EHD1-low (staining intensity of 1) or EHD1-negative samples ( $N=307$ ). (**E**) Significantly higher expression of EHD1 in metastatic lesions as compared to localized disease,  $\chi^2=22.389$ ;  $p=0.001$ , Spearman's correlation coefficient= 0.211;  $p < 0.001$

**Figure 2. EHD1 is required to sustain the *in vitro* oncogenic traits of Ewing Sarcoma cell lines. (A)** Western blot analysis of Doxycycline (Dox)-inducible knockdown of EHD1 in the indicated EWS cell lines. Cells stably expressing the non-targeting control shRNA (shNTC) or EHD1-specific shRNAs (shEHD1 #1, 2 or 3) were grown for 72h without (-) or with (+) 0.5  $\mu\text{g/ml}$  Dox before lysis and immunoblotting.  $\beta$ -actin served as a loading control. (**B**) Western blot analysis of CRISPR-Cas9 based EHD1-KO in EWS cell lines and their derivatives with mouse EHD1 (mEHD1) expression. The indicated cell lines engineered with non-targeting control (NTC) or EHD1-targeted Cas9-sgRNA (KO) two-in-one constructs or the KO lines with mEHD1 rescue (Res) were analyzed for EHD1 expression, with  $\beta$ -actin served as a loading control. (**C**) Impaired cell proliferation upon EHD1 knockdown. The indicated shNTC and shEHD1 TC71 or A673 cell lines pre-treated with Dox for 48 h were plated in 96-well plates and cell proliferation assessed at the indicated time points using the Cell-Titer-Glo assay. Y-axis, Relative Luminescence Units (RLU) as a measure of increase in the number of viable cells. Data points represent mean  $\pm$  SEM of three experiments, each with six replicates. (**D**) Impaired cell proliferation upon EHD1 knockout (KO) and rescue of proliferation defect by mEHD1. Cell proliferation was assessed as in C. (**E**) Impaired soft agar colony formation upon EHD1 knockdown. The indicated shNTC and shEHD1 TC71 or A673 cell lines pre-treated with Dox for 48h were plated in soft agar and the colony numbers quantified after 3 weeks of culture in the presence of Dox. Top, representative images of TC71 cells; scale bar, 1000  $\mu\text{m}$ . Bottom, mean  $\pm$  SEM of two experiments each in triplicates. (**F**) Impaired tumor-sphere formation upon EHD1 knockdown. Top, Representative images of TC71 cells; scale bar, 1000  $\mu\text{m}$ . Bottom, Mean  $\pm$  SEM of two experiments each in triplicates. (**G**) Impaired trans-well cell migration upon EHD1 knockdown. Top, representative images of TC71 cells; scale bar, 400  $\mu\text{m}$ . Bottom, quantification of the number of migrated cells per high-power field; mean  $\pm$  SEM of three experiments each in triplicates. (**H**) Impaired invasion through Matrigel-coated trans-wells upon EHD1 knockdown. Top, Representative images of TC71 cells; scale bar, 400  $\mu\text{m}$ . Bottom, quantification of the number of invaded cells per high-power field; Mean  $\pm$  SEM of three experiments each in triplicates. (**I**) Impaired trans-well cell migration upon EHD1 knockout (KO) and rescue of migration defect by mEHD1. Analyses done as in G. (**J**) Immunoblot analysis demonstrating mEHD1 overexpression relative to endogenous EHD1 in parental cells (P) in SK-ES-1 cells (**K**) Increased cell proliferation of SK-ES-1 cells upon mouse EHD1 (mEHD1) overexpression by Cell-Titer-Glo assay. Data points represent mean  $\pm$  SEM of 3 experiments each with six replicates. (**L-M**) Transwell migration and invasion assays in SKES1-mEHD1 cells as compared to control cells. Data points represent mean  $\pm$  SEM of two experiments each in triplicates; \* $p < 0.05$ , \*\* $p < 0.01$ , \*\*\* $p < 0.001$ , ns= not significant.

**Figure 3. Loss of EHD1 expression markedly impairs the growth and metastasis to lungs of bone-implanted EWS cells.**  $2 \times 10^5$  TC71 cells edited with non-targeting (NTC) or EHD1-targeted sgRNA (EHD1-KO), or the EHD1-KO cells rescued with mEHD1, all carrying a mCherry-luciferase reporter were injected in tibias of 6-week-old nude mice (8/group) and primary tumor growth was monitored by

bioluminescence imaging at the indicated time points in mice with detectable bioluminescent signals at the outset (6 for NTC and EHD1-KO groups; 8 for Rescue group). **(A)** Images of individual mice with superimposed luminescence signals over time. **(B)** Plots of log total flux values over time. Differences between groups were analyzed using two-way ANOVA;  $**p<0.01$ . **(C-D)** Bioluminescence signals of lungs harvested at necropsy are shown as individual images (C) and as quantified log total flux (D). **(E)** Micro-CT scanned images of tibias isolated from mice in the indicated groups. 3 mice per group were scanned. **(F)** Quantification of percent bone volume (BV/TV), trabecular thickness (Tb.Th), trabecular number (Tb.N) and trabecular separation (Tb.Sp) of scanned images from E, by CTAn software. Data represent Mean  $\pm$  SEM, ( $*p<0.05$ ,  $**p<0.01$ ,  $***p<0.001$ ).

**Figure 4. Identification of insulin like growth factor-1 receptor (IGF-1R) as a regulatory target of EHD1 in EWS.** **(A)** Phospho-RTK antibody array analysis. Membranes arrayed with antibodies against phosphorylated versions of 49 human RTKs (each in duplicate) were probed with lysates of TC71-shEHD1 or A673-shEHD1 treated with or without Dox. Left, Images of membranes with IGF-1R spots indicated. Right, Densitometric quantification of IGF-1R signals. **(B)** Western blot showing reduced total IGF-1R protein levels in TC71 cells upon Dox-induced EHD1 knockdown. Cell lysates were probed with an anti-IGF-1R $\beta$  antibody with  $\beta$  actin as a loading control. **(C)** Reduction in total IGF-1R levels upon EHD1-KO and rescue by mEHD1 expression in EHD1-KO EWS cells. Lysates of the indicated cell lines probed with anti-IGF-1R $\beta$  antibody; HSC70 or  $\beta$  actin served as loading controls. **(D)** EHD1-KO leads to reduced cell surface expression of IGF-1R on EWS cell lines. Control and EHD1-KO TC71 (top panel) and A673 (bottom panel) cells were grown in regular medium (steady-state), stimulated with IGF-1 (100 ng/ml) for 16 hours prior to analysis to promote the IGF-1R degradation (continued IGF-1), or cells pre-treated with IGF-1 were switched to low serum-containing and IGF-1-free medium (starvation) to promote the cell surface accumulation of newly-synthesized and recycled IGF-1R. Live cells were stained with anti-IGF-1R or IgG control antibody and analyzed by FACS. Left, representative histograms. Right, quantification of surface IGF-1R expression. Data represents the fold ratio of Median fluorescence intensity (MFI) relative to NTC cells under starvation condition (assigned a normalized value of 1). mean  $\pm$  SEM of six independent experiments. N=3, ( $*p<0.05$ ,  $**p<0.01$ ,  $***p<0.001$ , ns= not significant). **(E)** Representative immunoblotting (with densitometric quantification) for total IGF-1R expression in samples analyzed under D. **(F-I)** Positive correlation of EHD1 and IGF-1R expression in EWS patient tumors. Anti-IGF-1R IHC staining was carried out on TMAs from the same patient cohort as that analyzed for EHD1 expression (in Fig. 1). **F** shows the representative examples of the IGF-1R staining intensity of 0-3 **G** shows the relative distribution of high (staining intensity of 2-3; 60.35%), low (staining intensity of 1; 24.67%) or negative (staining intensity of 0; 14.9%) IGF-1R staining among 227 evaluable patients. **H** shows the correlation between EHD1 and IGF-1R staining intensities. Y-axis, number of cases displaying IGF-1R staining intensities of 0,1, 2 or 3. X-axis, EHD1 staining intensities, 0-3. Spearman's Correlation Coefficient= 0.179,  $p=0.009$ . **I** shows expression of EHD1 and IGF-1R in localized disease, disseminated, relapse and metastatic lesions.

**Figure 5. EHD1 controls cell surface IGF-1R levels by regulating its endocytic recycling and Golgi to the plasma membrane traffic.** **(A)** EHD1-IGF-1R association in EWS cells. Anti-IGF-1R $\beta$  or anti-EHD1 antibody immunoprecipitates (IP) from 1 mg lysate protein aliquots of the indicated cell lines were subjected to Western blotting for IGF-1R $\beta$  or EHD1; co-IP is observed in both directions. **(B)** EHD1-KO impairs IGF-1R endocytic recycling. TC71 NTC or EHD1-KO cells pretreated with cycloheximide (50  $\mu$ g/ml) for 2h to prevent new protein synthesis were treated with IGF-1 to promote the ligand-induced IGF-1R internalization (time 0), followed by incubation in IGF-1-free medium (30 and 60 min). Fixed and permeabilized cells were co-stained for IGF-1R $\beta$  (green), RAB11 (recycling endosome marker; red) and nuclei (DAPI, blue), and analyzed using confocal imaging to assess the delivery of IGF-1R into recycling endosomes and its subsequent recycling to the cell surface. Top left, a schematic of the treatments. Bottom, Co-staining for IGF-1R and RAB11. The zoomed in panels (4<sup>th</sup> columns for each cell line) show high co-localization of IGF-1R and Rab11+ in TC71-NTC cells at time 0 (after IGF-1-induced internalization) with

reduction over time, concurrent with increased plasma membrane IGF-1R signals. In EHD1-KO cells, a more persistent co-localization is seen over time with lesser increase in plasma membrane signals over time. Top center, the data is expressed as a % of fluorescence intensity of plasma membrane IGF-1R using ImageJ. Top right, % colocalization of IGF-1R with RAB11 over time, by Pearson's correlation coefficient quantification using ImageJ. 50 cells from three independent experiments were analyzed. (C) EHD1-KO impairs the Golgi to plasma membrane traffic of IGF-1R. The TC71-NTC and EHD1-KO cells pre-treated with IGF-1 (100 ng/ml) for 16 hours to deplete the cell surface IGF-1R (time 0) were subjected to serum/IGF-1 deprivation for 6,12 or 24h. Fixed and permeabilized cells were co-stained for IGF-1R $\beta$  (green), GM130 (Golgi marker; red) and nuclei (DAPI, blue), and analyzed using confocal imaging to assess the delivery of newly-synthesized IGF-1R at the Golgi followed by its delivery to the plasma membrane. Top left, a schematic of the treatments. Bottom, Co-staining for IGF-1R and GM130. The zoomed in panels (4<sup>th</sup> columns for each cell line) show a small GM130-colocalizing pool of IGF-1R in TC71-NTC cells with time-dependent increase in its cell surface pool. EHD1-KO cells show an increase in the GM130-colocalizing pool of IGF-1R over time with essentially no increase in the cell surface IGF-1R. Top right, quantification of the percentage of IGF-1R fluorescence signals at the plasma membrane using ImageJ. 80 cells were analyzed from three independent experiments. B and C, scale bar, 10  $\mu$ m. Mean  $\pm$  SEM. (\* $p$ <0.05, \*\* $p$ <0.01, ns= not significant).

**Figure 6. Loss of EHD1 expression leads to lysosomal degradation of IGF-1R.** (A-B) Recovery of IGF-1R protein levels upon inhibition of lysosomal protein degradation with Bafilomycin A1. NTC or EHD1-KO TC71 and A673 cell lines were switched to low serum/IGF-1 free medium for 6 h in the absence or presence of Bafilomycin-A1 (200 nM) and total IGF-1R levels in cell lysates were analyzed by western blotting (A). The quantified IGF-1R signals normalized to  $\beta$  actin loading control are shown in B. Data represent mean  $\pm$  SEM of 3 experiments. Note the significant increase (\*\*,  $p$ <0.01) in IGF-1R levels in EHD1-KO cells with no significant change in NTC cells (ns, not significant). (C-F) Lysosomal mis-targeting of IGF-1R in EHD1-KO EWS cells. NTC or EHD1-KO TC71 and A673 cells were left untreated or treated with bafilomycin-A1 as in (A-B) and co-stained for IGF-1R (green), LAMP1 (lysosome marker, red) and nuclei (DAPI, blue). IGF-1R localization to lysosomes (yellow) is visualized in merged images (third columns) in the representative images shown in C and E. Scale bar, 10  $\mu$ m. Pearson's correlation coefficients (D and F) of the co-localized IGF-1R and LAMP1 fluorescence signals were determined from analyses of  $n$ >30 cells per group from three independent experiments (\*\* $p$ <0.01, \*\*\* $p$ <0.001, ns= not significant).

**Figure 7. Loss of EHD1 expression in EWS cells impairs the IGF-1-dependent signaling downstream of IGF-1R.** (A-B) Western blot analysis of phosphorylation of IGF-1R and key signaling pathway reporters (AKT and ERK1/2). NTC or EHD1-KO TC71 and A673 cell lines were pre-starved for 24h in low serum/IGF-free medium and left unstimulated (0) or stimulated with IGF-1 (50 ng/ml) for the indicated time points (min, minutes). Cell lysates were analyzed by Western blotting with the indicated antibodies, with  $\beta$  actin as loading control. (C-D) Densitometric quantification of the phosphorylation signals of IGF-1R, AKT and ERK (from the data represented in A-B) normalized to the values of total proteins. Data represent mean  $\pm$  SEM of 3 experiments. (E) Gene-set enrichment (GSE) analysis from RNA-sequencing of two groups of TC71 cell lines- TC71 shEHD1+Dox vs. shNTC+Dox, showing enrichment of PI3K-AKT-mTOR signaling genes in shNTC+Dox cells and significant downregulation of the same in the shEHD1+Dox group. (F) EHD1-KO impairs the IGF-1-dependent pro-survival effects in EWS cells. Flow cytometric analysis of apoptosis in the indicated cells treated with or without 1  $\mu$ M linsitinib for 24 hours as assessed by Annexin-V and PI staining. (G) Impaired IGF-1-induced proliferation in EHD1-KO EWS cell lines. NTC or EHD1-KO TC71 and A673 cells were cultured in regular medium for 24h, switched to medium with 1% FBS and 100 ng/ml IGF-1) in the absence or presence of 1  $\mu$ M IGF-1R inhibitor linsitinib and cell proliferation measured at the indicated time points by Cell-Titer Glo assay. Data represent mean  $\pm$  SEM of three experiments, each in six replicates. (H) Impaired IGF-1-induced cell migration in EHD1-KO EWS cell lines. NTC or EHD1-KO TC71 and A673 cells plated in top chambers of trans-wells in the

absence or presence of 1  $\mu$ M IGF-1R inhibitor linsitinib, with migration towards the medium with 1% FBS and 100 ng/ml IGF-1 in lower chambers. Data represent mean  $\pm$  SEM of three experiments; \*,  $p < 0.05$ , \*\* $p < 0.01$ \*\*\*,  $p < 0.001$ .

**Figure 8. EHD1-dependent upregulation of oncogenic attributes of EWS cell lines requires the IGF-1R.** Mouse EHD1 (mEHD1)-overexpressing SK-ES-1 cell line was used to assess the requirement of IGF-1R in EHD1-driven pro-oncogenic attributes. SK-ES-1-mEHD1 cells transiently transfected with non-targeting control (NTC) or IGF-1R-targeted siRNA or treated with IGF-1R inhibitor linsitinib (1  $\mu$ M), IGF-1R mAb 1H7 (5  $\mu$ g/mL), mouse Isotype IgG1 (5  $\mu$ g/mL) were studied for indicated traits. **(A)** Representative western blot confirming the effective IGF-1R knockdown upon transient IGF-1R siRNA relative to NTC siRNA transfection. **(B)** Western blot showing effective elimination of phospho-IGF-1R signals by IGF-1R siRNA knockdown or linsitinib treatment in SK-ES-1-mEHD1 cells. **(C)** Elevated cell proliferation upon mEHD1 overexpression requires IGF-1R expression and activity. The SK-ES-1-mEHD1 cells were analyzed for IGF-1 (100 ng/ml)-dependent cell proliferation by Cell-Titer Glo assay with or without the indicated treatments. Parental SK-ES-1 cells without any treatments provided a baseline of cell proliferation without mEHD1 overexpression. **(D)** Elevated cell survival upon mEHD1 overexpression requires IGF-1R expression and activity. The SK-ES-1-mEHD1 cells grown in the presence of IGF-1 (100 ng/ml) without or with the indicated treatments for 3 days were analyzed for the proportion of apoptotic cells by FACS after Annexin-V and PI staining. **(E-F)** Elevated cell migration and invasion upon mEHD1 overexpression requires IGF-1R expression and activity. The SK-ES-1-mEHD1 cells were analyzed for IGF-1 (100 ng/ml)-dependent trans-well cell migration or invasion without or with the indicated treatments. Parental SK-ES-1 cells without any treatments provided a baseline of cell migration without mEHD1 overexpression. Mean  $\pm$  SEM of 3 experiments, each in triplicates. \* $p < 0.05$ ; \*\* $p < 0.01$ ; \*\*\* $p < 0.001$ ; ns, not significant. **(G-I)** Inhibition of cell proliferation **(G)**, cell migration**(H)** and invasion**(I)** in SK-ES-1 mEHD1 cells with IGF-1R mAb 1H7. Analyses done as in C-F. **(J)** A model of how the EHD1/IGF-1R axis promotes the IGF-1R-mediated signaling and tumor progression in Ewing Sarcoma. EHD1 overexpression enhances the endocytic recycling and Golgi to plasma membrane transport of IGF-1R to elevate the cell surface receptor levels, thus enhancing IGF-1R-dependent signaling. Loss of EHD1 leads to IGF-1R mistargeting to lysosomes where it is degraded, resulting in reduced cell surface IGF-1R, diminished IGF-1R signaling and impaired tumorigenesis.

**A**

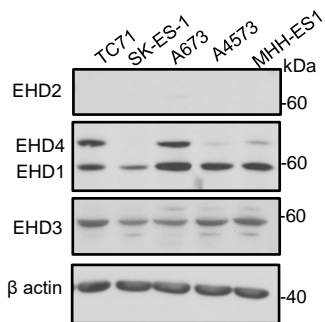

**B**

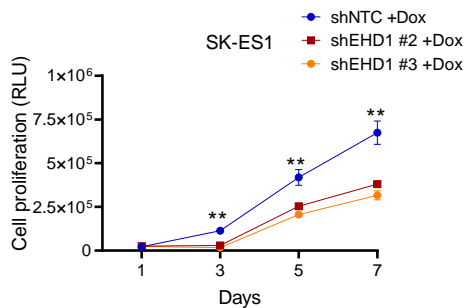

**C**

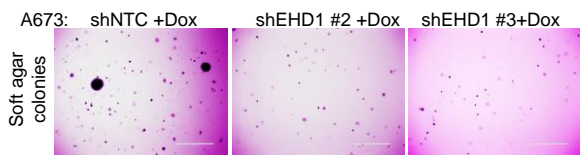

**D**

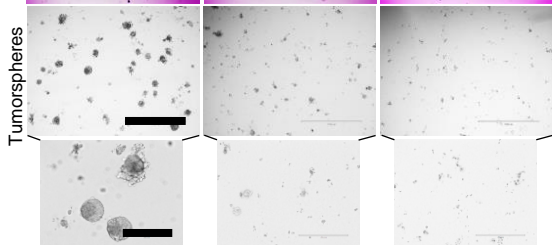

**E**

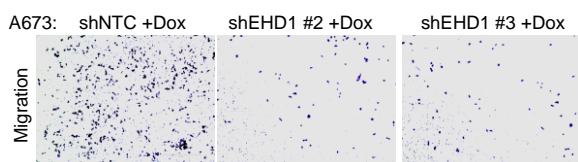

**F**

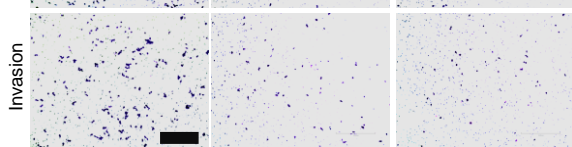

**I**

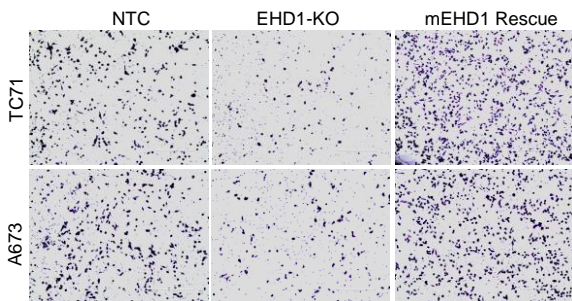

**G** SK-ES-1: shNTC +Dox shEHD1 #2 +Dox shEHD1 #3 +Dox

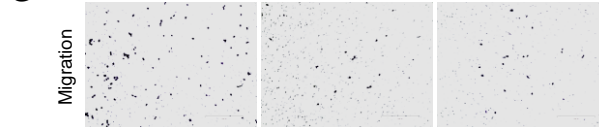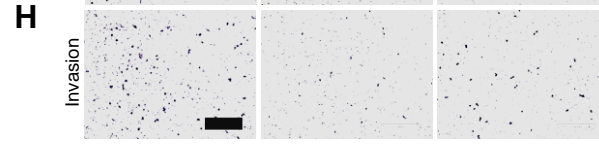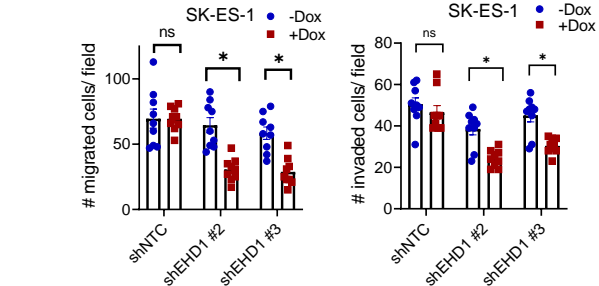

**J**

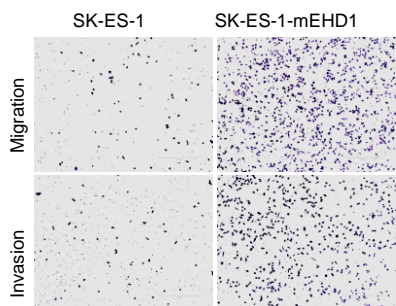

**K**

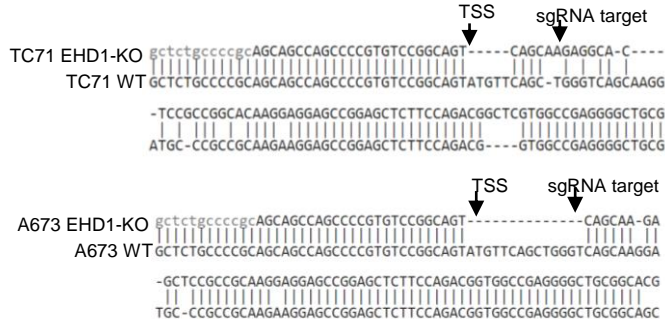

A

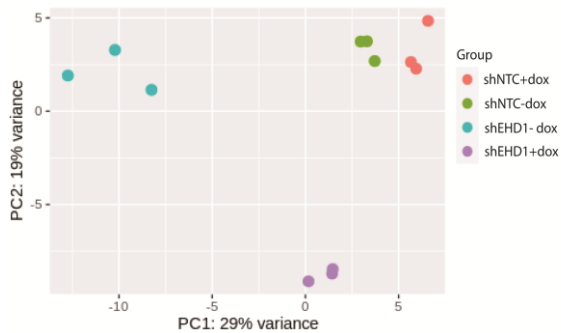

B

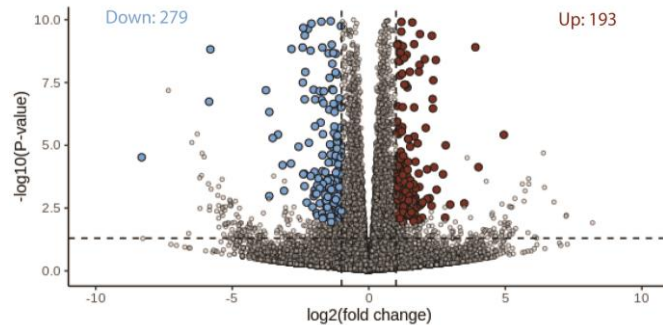

C

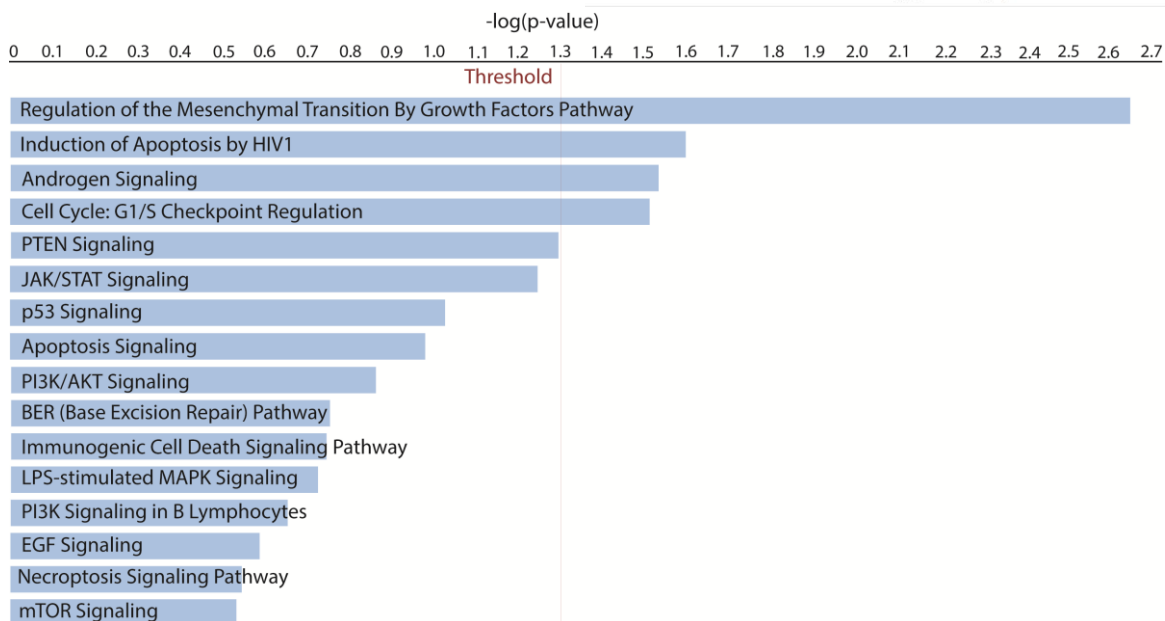

D

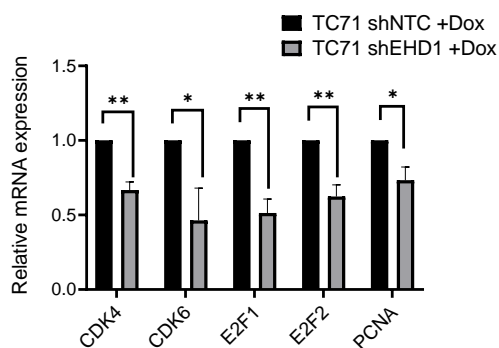

E

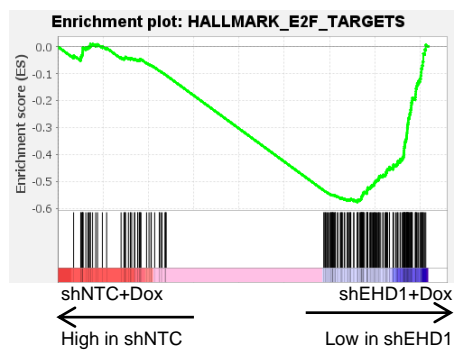

F

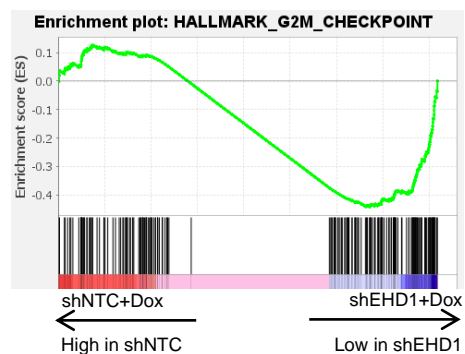

A

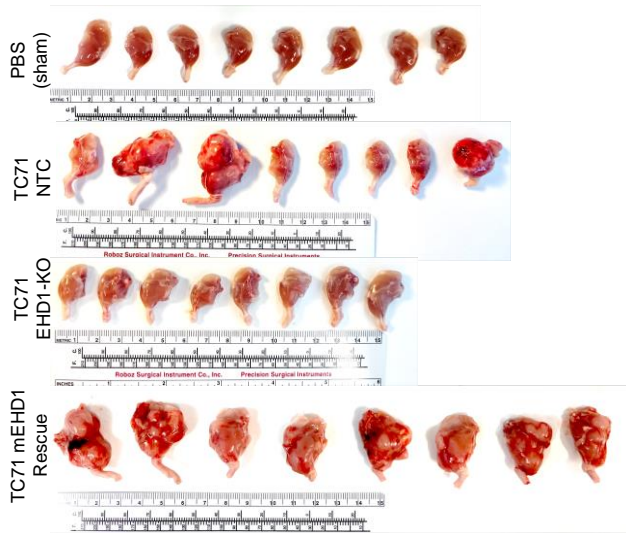

B

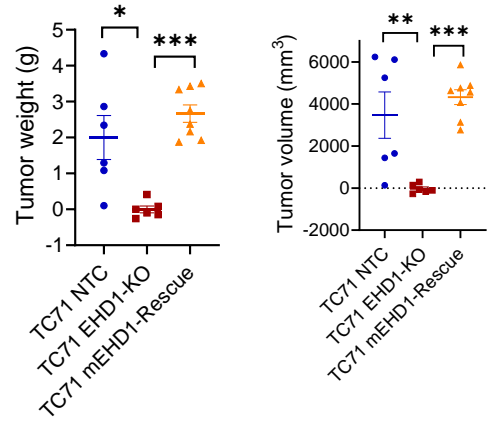

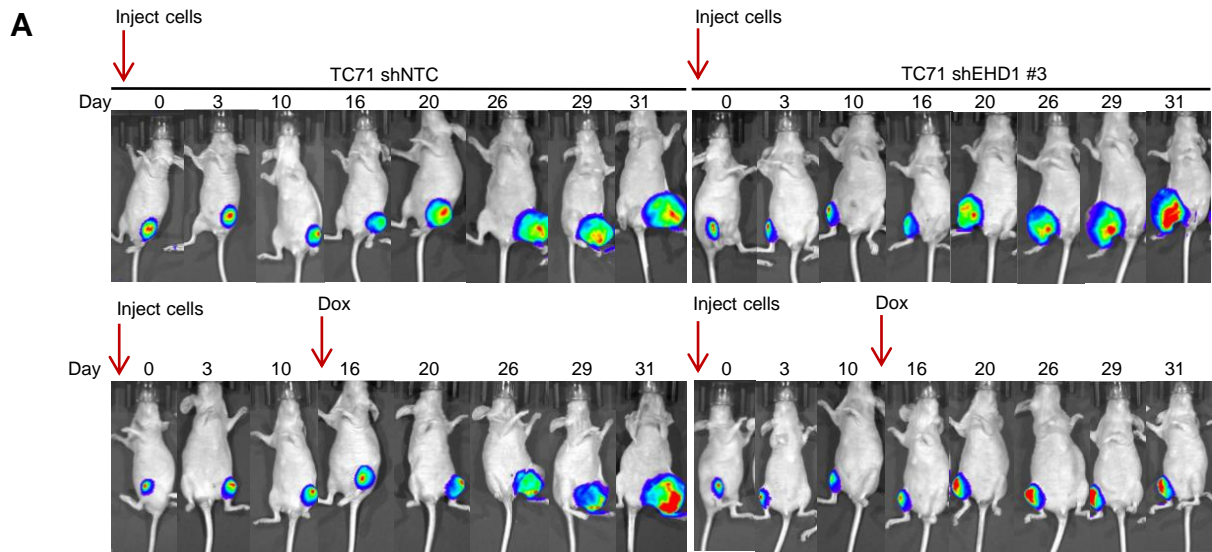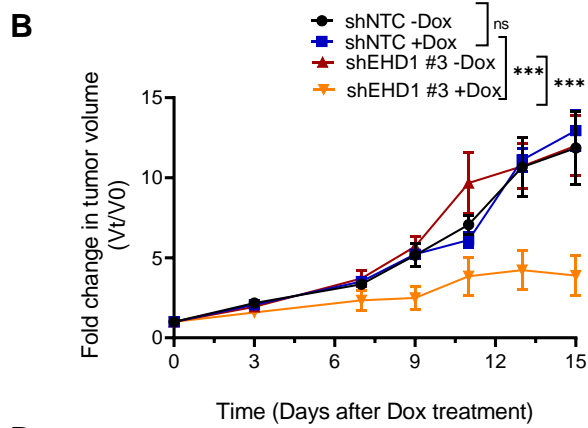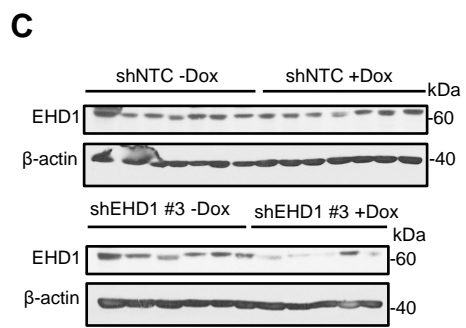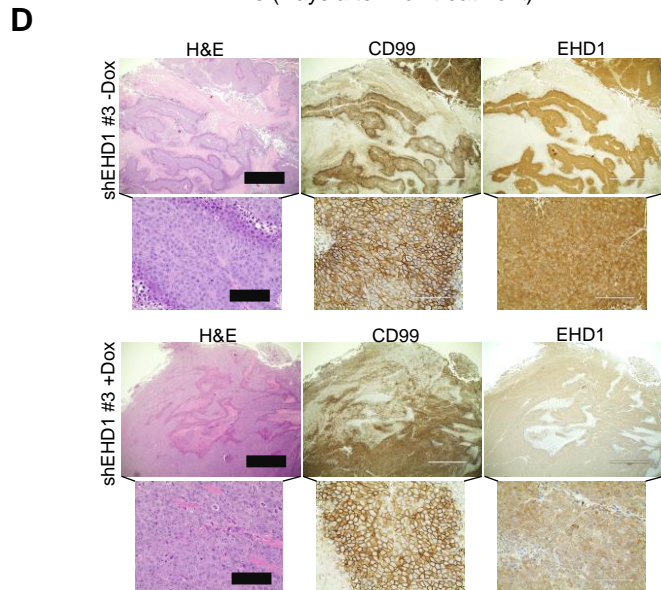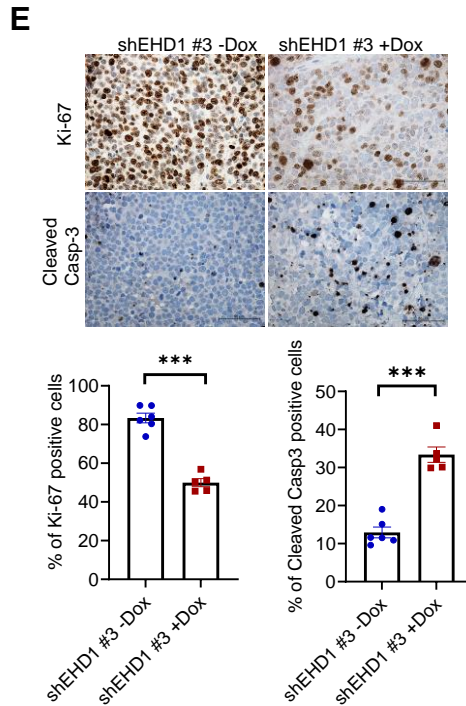



**A**

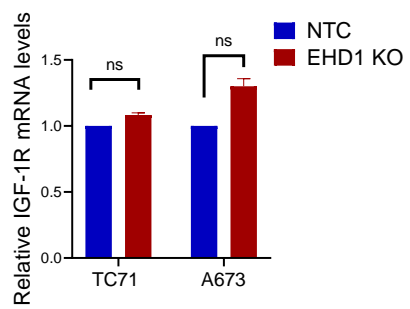

**B**

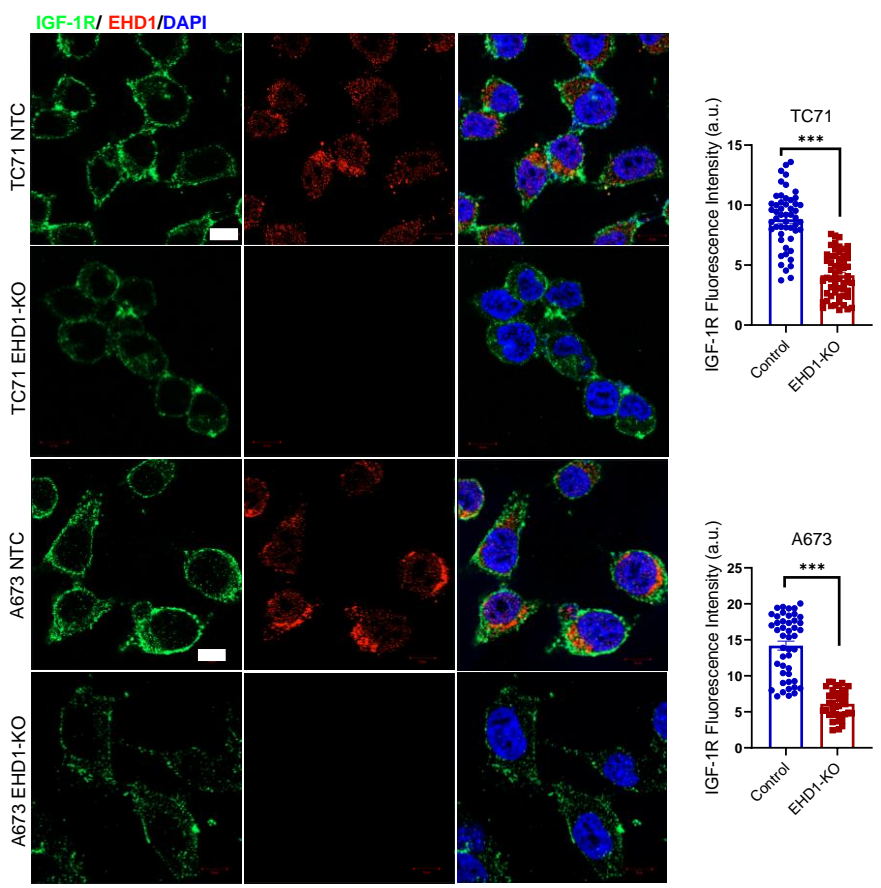

A

A673 IGF-1R/ EHD1/DAPI

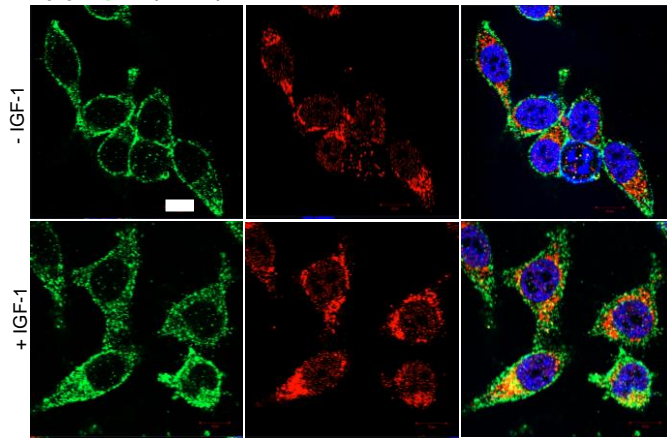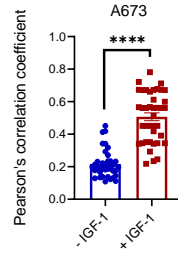

B

TC71 IGF-1R/ EHD1/DAPI

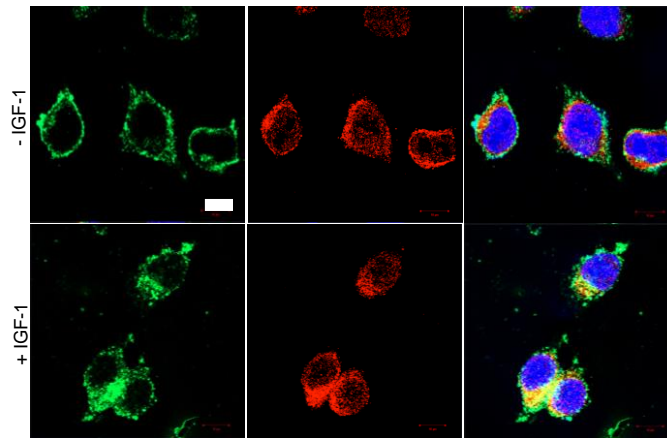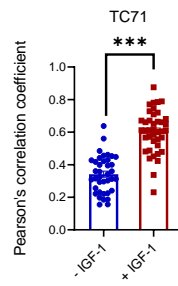

A

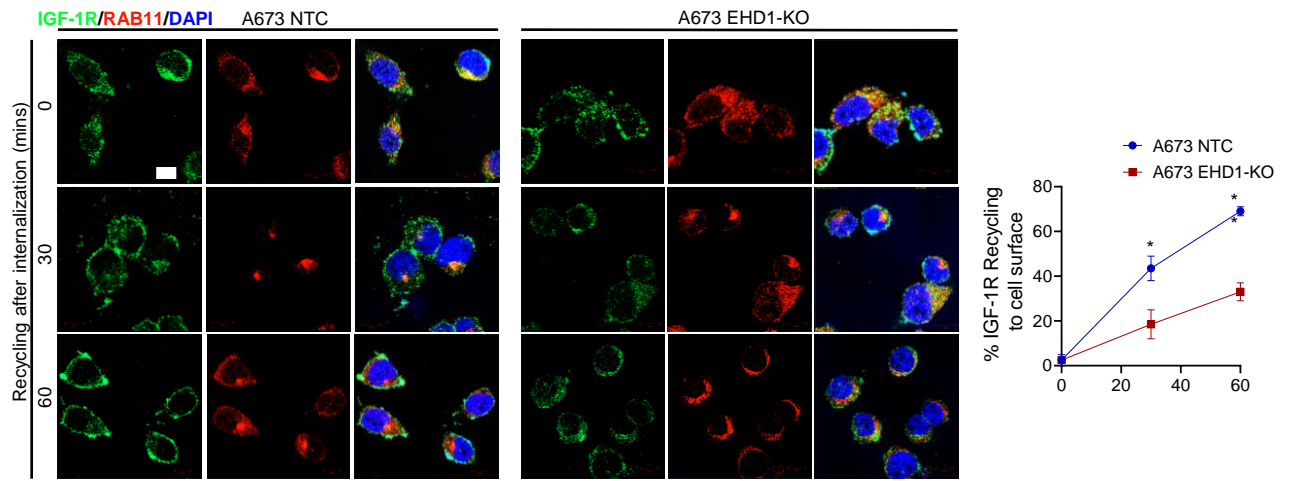

B

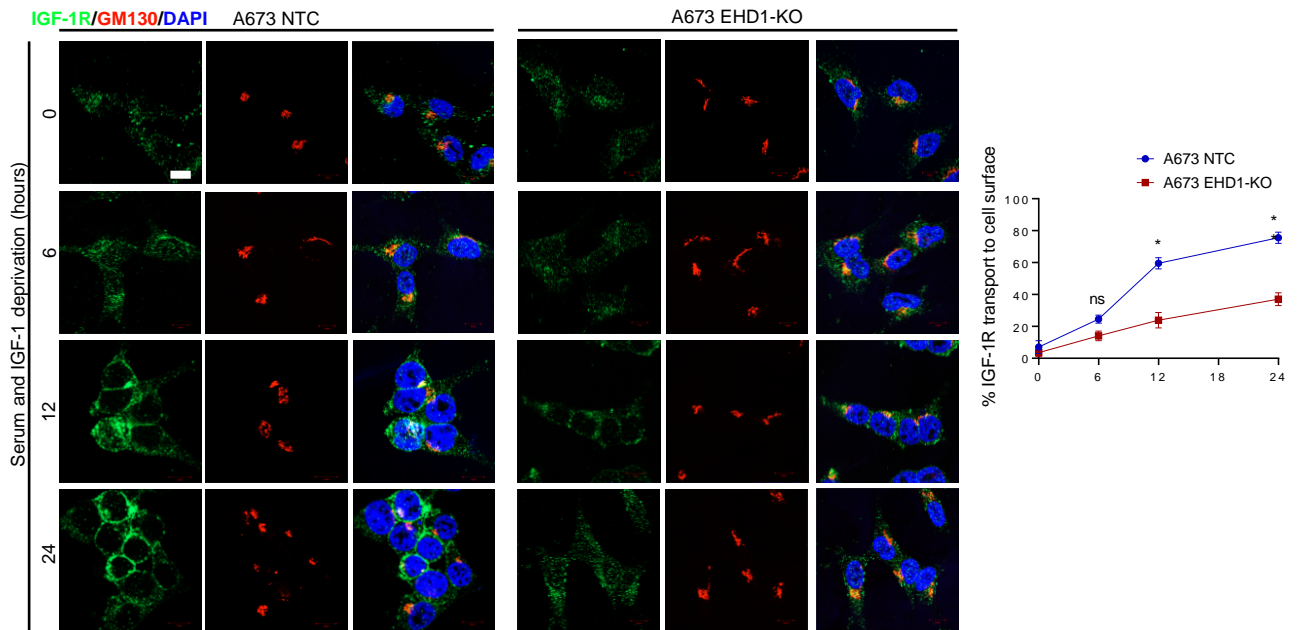

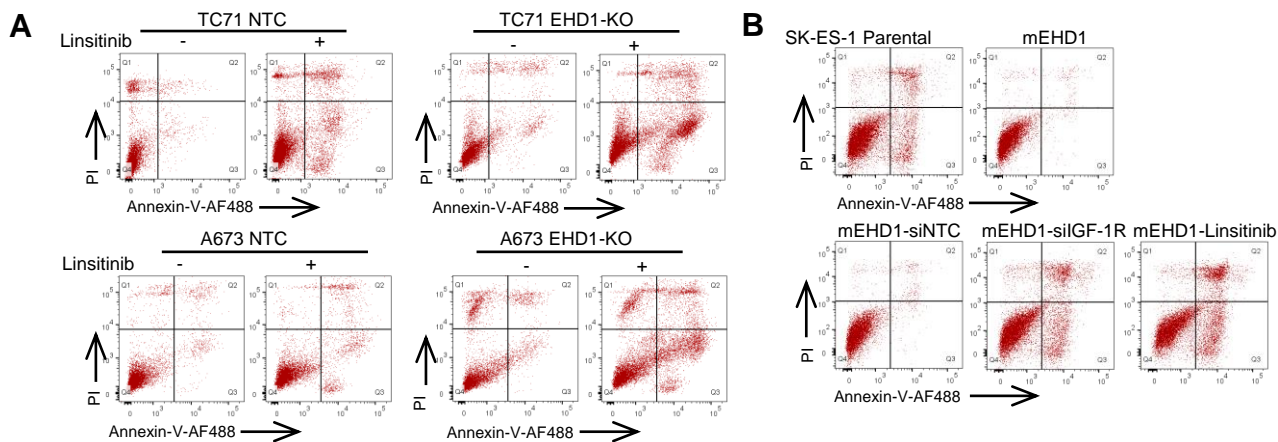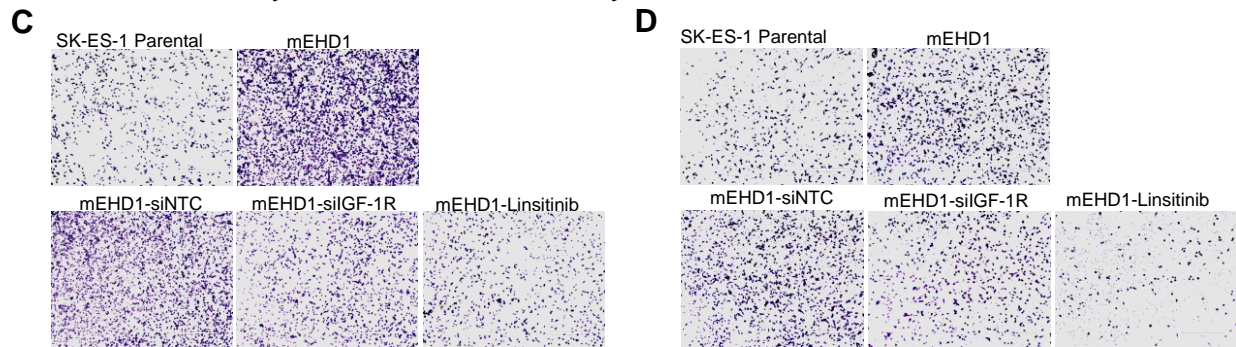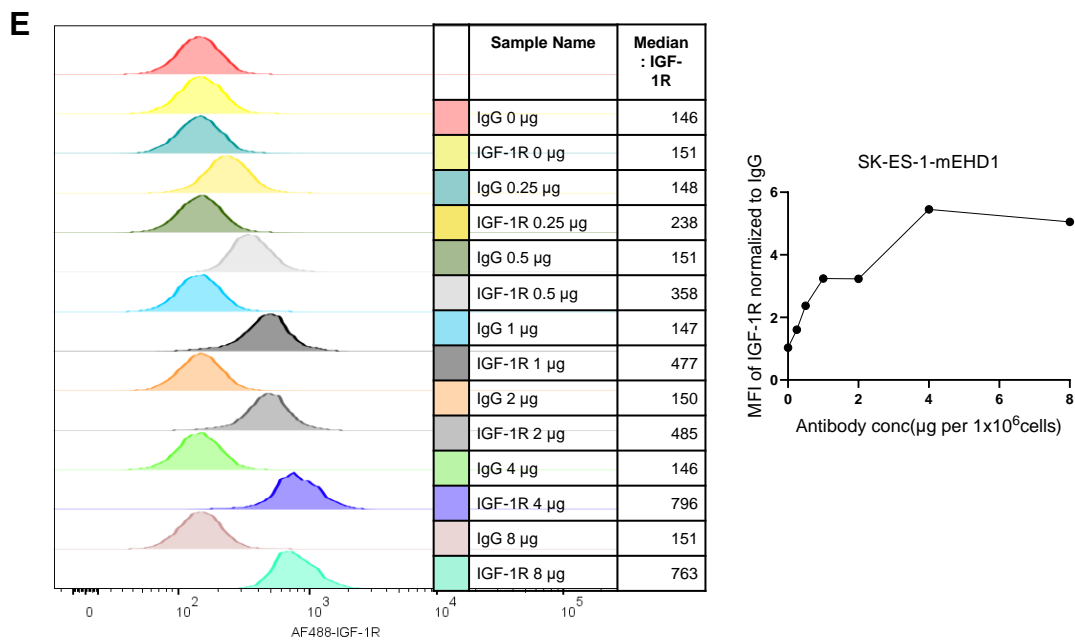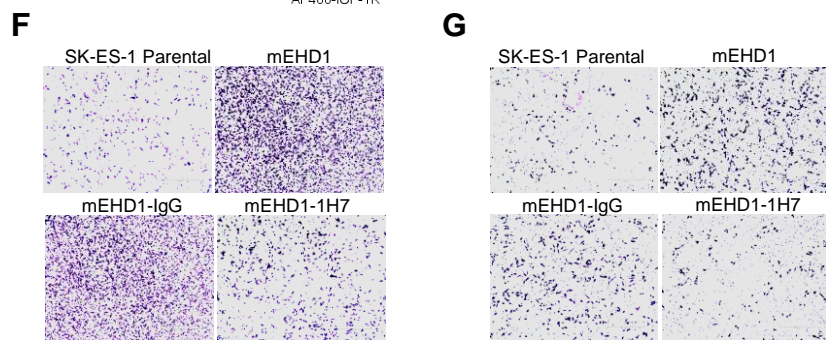

## Supplementary Figure legends and Tables

**Supplementary Fig. S1. EHD1 is required to sustain the in vitro oncogenic traits of Ewing Sarcoma cell lines** (A) Immunoblot analysis of EHD1 and its family members in the indicated EWS cell lines.  $\beta$  actin served as loading control. (B) Impaired proliferation of SK-ES-1 cells upon EHD1 knockdown. Cell-titer-glo assay at the indicated time points in the presence of Dox. Mean  $\pm$  SEM of three experiments, each with six replicates. (C-D) Impaired soft agar colony growth (C) and tumor-sphere forming ability (D) of A673 cells upon EHD1 knockdown. Representative images of A673 cells (Fig. 2E-F; bottom) are shown. (E-F) Impaired trans-well migration (E) and invasion (F) in A673 cells upon EHD1 knockdown. Representative images of A673 cells (Fig. 2G-H; bottom) are shown. (G-H) Impaired of trans-well migration (G) and invasion (H) in SK-ES-1 cells upon EHD1 knockdown. Top, representative images of SK-ES-1 cells; scale bar, 400  $\mu$ m. Bottom, quantification of the number of migrated/invaded cells per high-power field; mean  $\pm$  SEM of three experiments each in triplicates. (I) Representative images of Fig2I showing impaired trans-well cell migration upon EHD1 knockout (KO) and rescue of migration defect by mEHD1. (J) Representative images of Fig2L-M showing increase in transwell migration and invasion upon mEHD1 overexpression in SK-ES-1 cells. (K) CRISPR-Cas9 knockout site assessment of EHD1 by Sanger sequencing showing deletion of bases, removal of start codon and frameshift mutations near the sgRNA targeted sequence in TC71 and A673 cell lines. Wildtype (WT) sequences are shown as reference.

**Supplementary Fig. S2. RNA-Sequencing analysis of shNTC and shEHD1+dox TC71 cell line** (A) PCA analysis of RNA-seq data shows four datasets – TC71 shNTC  $-/+$ Dox, shEHD1  $-/+$  Dox. PC1 represent 29% variance and PC2 represent 19% variance. (B) Volcano plot showing differentially expressed genes – upregulated (in red), downregulated (in blue). (C) Canonical signaling pathways affected by the differentially expressed genes by Ingenuity-Pathway Analysis (IPA) software. Vertical line indicates threshold of  $-\log_{10}(\text{p-value})=1.3$  (D) Validation of G1 to S cell cycle regulatory genes by qPCR analysis in TC71 shEHD1  $-/+$ Dox groups. (mean  $\pm$  SEM of three experiments, \* $p<0.05$ , \*\* $p<0.01$ ) (E-F) Gene-set enrichment (GSE) analysis was performed on the RNA-sequencing of two groups of TC71 cell lines- TC71 shEHD1+Dox vs. shNTC+Dox, showing enrichment of E2F-targets (E) and G2-M cell cycle checkpoint(F) genes in shNTC+Dox cells and significant downregulation of the same in the shEHD1+Dox group. Differential expression was assessed by DESeq2 and significantly changed genes were required to have a Benjamini–Hochberg adjusted p-value of  $<0.05$  and a 2-fold change in expression.

**Supplementary Fig. S3. Loss of EHD1 expression markedly impairs the growth of bone implanted EWS cells.** (A) Images of tumors harvested at the end of the experiment shown in Fig. 3A-D together with the sham (PBS)-injected contralateral legs of the mice injected with TC71-NTC cells. (B) Quantification of harvested tumor weight (left panel) and volume (measurement with calipers (volume = length x width x depth/2); right panel). Values of sham-injected legs were subtracted from the experimental values.

**Supplementary Fig. S4. Demonstration of EHD1 requirement for EWS tumorigenesis using Dox-inducible shRNA knockdown.** Intratibial tumor injections with the indicated TC71 cell lines with Dox-inducible control (shNTC) or EHD1 (shEHD1#3) shRNA were done as in Fig. 3.; 7 mice/group. (A) Images of one out of seven mice in various groups with super-imposed luminescence signals over 31 days. (B) Tumor growth with the injections of the indicated TC71 derivatives, with or without Dox administration. Differences between the indicated groups analyzed using the two-way ANOVA; \*\*\* $p<0.001$ . Note lack of impact of Dox on tumors generated with TC71 shNTC. (C) Western blots of harvested tumor tissue to confirm Dox-induced EHD1 knockdown in TC71 shEHD1 #3 xenografts. (D) Representative tumor sections of TC71-shEHD1-Dox and shEHD1+Dox tumors stained with H&E (left panels), CD99 (middle panels, demarcating the human EWS tumor cell area) and EHD1 (right panels). (E) IHC staining for Ki-67 and Cleaved-Caspase-3 in tumor sections from the indicated groups. Top, representative images; bottom, quantification IHC staining positive cells. Mean  $\pm$  SEM; \* $p<0.05$ , \*\* $p<0.01$ , \*\*\* $p<0.001$ , ns= not significant.

**Supplementary Fig. S5. Identification of insulin like growth factor-1 receptor (IGF-1R) as a regulatory target of EHD1 in EWS.** (A) EHD1-KO in EWS cell lines does not affect the IGF-1R mRNA expression. Shown are the qRT-PCR based results of IGF-1R mRNA expression, normalized to GAPDH and expressed as a fold change relative to the respective NTC control cell lines (set to 1). Data represent mean  $\pm$  SEM of 3 independent experiments (ns= not significant). (B) Reduction in IGF-1R levels upon EHD1-KO in EWS cell lines analyzed by immunofluorescence staining and confocal imaging. IGF-1R (green) and EHD1 (red) staining in Control and EHD1-KO TC71 and A673 cells. Cells grown under steady-state were fixed and permeabilized and stained with the indicated antibodies (with concurrent IgG controls; not shown). Left, representative confocal images. Merged pictures with DAPI (blue) are shown in right panels. Right, Quantification of the IGF-1R fluorescence intensity. Scale bar (only shown in left panels of the NTC lines), 10  $\mu$ m. Data points represent images of 60 cells pooled from three independent experiments.

**Supplementary Fig. S6. EHD1 and IGF-1R colocalize in intracellular vesicular structures.** (A-B) Representative confocal images of the colocalization of EHD1 (red) and IGF-1R (green) in A673 (A) and TC71 (B) cells without (top panels) and with (bottom panels) IGF-1 (50 ng/ml) stimulation for 1h. Merged pictures (right panels) with DAPI (blue) show colocalization within perinuclear vesicular structures. Scale bar, 10  $\mu$ m. Colocalization was assessed in 40 cells in three independent experiments to determine the colocalization coefficients. Data represent the mean  $\pm$  SEM. \*\*\* $p$ <0.001.

**Supplementary Fig. S7. Impairment of IGF-1R transport from the Golgi and recycling endosomes to the plasma membrane by EHD1-KO in A673 cell line.** The analyses with A673 NTC and EHD1-KO cells were carried out exactly as described in Fig. 5 for TC71 cells. (A) Analysis of IGF-1R endocytic recycling; IGF-1R, green; Recycling endosome (Rab11+), red. (B) Analysis of IGF-1R Golgi to plasma membrane transport; IGF-1R, green; Golgi (GM130+), red. Top panels, representative confocal images (zoomed images in third column). Bottom, quantification of cell surface IGF-1R at various time points using the ImageJ. Data represent mean  $\pm$  SEM. \* $p$ <0.05; \*\* $p$ <0.01; ns, not significant. Scale bar, 10  $\mu$ m.

**Supplementary Fig. S8. EHD1-dependent upregulation of oncogenic attributes of EWS cell lines requires the IGF-1R.** (A) Representative flow panel of Annexin-V-PI assay (Figure 7F) in TC71 and A673 NTC and EHD-KO cells, with the indicated treatments. (B) Representative flow panel of Annexin-V-PI assay (Figure 8D) in SK-ES-1 mEHD1 overexpressing cell line, with the indicated treatments. (C-D) Representative high-power fields of migration and invasion assays corresponding to Figure 8E-F. (E) Dose-response of IGF-1R monoclonal antibody 1H7 showing saturation at 4 $\mu$ g antibody concentration/million cells. Representative flow panels(left), graph plotting Median fluorescence intensity (MFI) normalized to same concentration of mouse isotype control IgG1(right) (F-G) Representative high-power fields of migration and invasion assays corresponding to Figure 8H-I.

**Table 1: mRNA expression of EHD1 in Ewing Sarcoma cell lines (CCLE):**

|                             |                             |
|-----------------------------|-----------------------------|
| RDES                        | 5.098453246                 |
| <a href="#">A673</a>        | <a href="#">5.095080492</a> |
| CHLA10                      | 4.716442237                 |
| <a href="#">MHES1</a>       | <a href="#">4.697106574</a> |
| <a href="#">TC71</a>        | <a href="#">4.539779192</a> |
| SKNEP1                      | 4.468583317                 |
| EWS502                      | 4.457462965                 |
| SKNMC                       | 4.327687364                 |
| <a href="#">SKES1</a>       | <a href="#">4.213347282</a> |
| CADOES1                     | 4.183486514                 |
| CHLA9                       | 4.04701482                  |
| EW8                         | 3.806324057                 |
| CHLA32                      | 3.69265037                  |
| CBAGPN                      | 3.678071905                 |
| CHLA218                     | 3.673556424                 |
| CHLA99                      | 3.486714373                 |
| TC138                       | 3.416839742                 |
| TC205                       | 2.929790998                 |
| TC106                       | 2.843983844                 |
|                             |                             |
| Highest of 1,408 cell lines | 7.962953828                 |
| Lowest of 1,408 cell lines  | 0.879705766                 |
| Median of 1408 cell lines   | 4.840463234                 |

**Table 2. Higher expression of EHD1 in metastatic lesions:**

| EHD1  | Tissue sample |              |         |                  | Total |
|-------|---------------|--------------|---------|------------------|-------|
|       | Localized     | Disseminated | Relapse | Metastasis       |       |
| 0     | 33 (12.4%)    | 0 (0%)       | 2 (20%) | 0 (0%)<br>0 (0%) | 35    |
| 1     | 118 (44.2%)   | 15 (33.3%)   | 3 (30%) | 15               | 126   |
| 2     | 116 (43.4%)   | 10 (66.7%)   | 5 (50%) | (100%)           | 146   |
| Total | 267           | 15           | 10      | 15               | 307   |

$\chi^2 = 22.389$ ;  $p = 0.001$

Spearman's correlation coefficient= 0.211;  $p < 0.001$

**Table 3. Co-expression of IGF-1R-EHD1 - Frequencies considering all tissue types and only primary tumors:**

| IGF-1R-EHD1             |             |                |
|-------------------------|-------------|----------------|
|                         | All tissues | Primary tumors |
| Negative                | 4 (1.9%)    | 4 (2.2%)       |
| EHD1 or IGF-1R positive | 84 (39.1%)  | 76 (41.5%)     |
| Both positive           | 127 (59.1%) | 103 (56.3%)    |
| Total                   | 183         | 183            |

**Table 4. Correlation between IGF-1R-EHD1 co-expression and tissue types:**

| IGF-1R_EHD1     | Tissue sample |              |           |            | Total |
|-----------------|---------------|--------------|-----------|------------|-------|
|                 | Localized     | Disseminated | Relapse   | Metastasis |       |
| Negative        | 4 (1.9%)      | 0 (0%)       | 0 (0%)    | 0 (0%)     | 4     |
| EHD1 or IGF-1R+ | 76 (41.5%)    | 2 (15.4%)    | 1 (16.7%) | 5 (38.5%)  | 84    |
| Both positive   | 103 (56.3%)   | 11 (84.6%)   | 5 (83.3%) | 8 (61.5%)  | 127   |
| Total           | 183           | 13           | 6         | 13         | 215   |

**Table 5. Association between IGF-1R-EHD1 co-expression and Overall survival (OS):**

| Parameters      | n  | Events | % OS | p-<br>Univariate |
|-----------------|----|--------|------|------------------|
| IGF-1R_EHD1     |    |        |      | 0.600            |
| Negative        | 4  | 1      | 75%  |                  |
| EHD1 or IGF-1R+ | 66 | 35     | 42%  |                  |



|               |    |  |  |  |
|---------------|----|--|--|--|
| Both positive | 91 |  |  |  |
|---------------|----|--|--|--|

**Table 6. Association between IGF-1R-EHD1 co-expression and Progression free survival (PFS):**

| Parameters       | n  | Events | %PFS  | p-Univariate |
|------------------|----|--------|-------|--------------|
| IGF-1R_EHD1      |    |        |       |              |
| Negative         | 4  | 1      | 75%   | 0.334        |
| EHD1 or IGF-1R + | 66 | 38     | 34.4% |              |
| Both positive    | 92 | 43     | 47%   |              |

**Table 7. Correlation between IGF-1R and EHD1 IHC expression (4 categories):**

| IGF-1R | EHD1    |           |            |                      | Total |
|--------|---------|-----------|------------|----------------------|-------|
|        | 0       | 1         | 2          | 3                    |       |
| 0      | 0 (0%)  | 2 (28.6%) | 21 (22.6%) | 9 (8%)<br>27 (23.9%) | 32    |
| 1      | 0 (0%)  | 2 (28.6%) | 22 (23.7%) | 60 (53.1%)           | 51    |
| 2      | 1 (50%) | 3 (42.9%) | 42 (45.2%) | 17 (15%)             | 106   |
| 3      | 1 (50%) | 0 (0%)    | 8 (8.6%)   | 113                  | 26    |
| Total  | 2       | 7         | 93         | 113                  | 215   |

$\chi^2=14.747$ ;  $p=0.098$

Spearman's Correlation coefficient= 0.179;  $p=0.009$
